# Supplementary material
Source: MDPI journal article supplement (https://www.mdpi.com/2076-3417/10/17/5977)
Supplement: s1 [file s1]

# **OR1**

## **Online Resource 1: TEMPLATE OF THE PATIENT DATA SHEET**

**Article title:** “In vivo” validation of 3D-printed innovative surgical template for lumbar spinal arthrodesis

**Journal name:** Medical & Biological Engineering & Computing

**Author names:** Alessandro Naddeo, Emilio Cataldo, Nicola Narciso, Francesco Naddeo, Nicola Cappetti

**Affiliation and e-mail address of the corresponding author:**

Corresponding Author: Francesco Naddeo

Department of Industrial Engineering, University of Salerno, Via Giovanni Paolo II, 132, 84084 Fisciano, SA,  
Italy

Email: frnaddeo@unisa.it

### **DATA SHEET FOR SPINAL CUSTOM MADE TEMPLATE TRIAL “SPINE SOLUTIONS”**

PATIENT CODE: XXXXXXXXXXXXX

**NUMBER OF TREATED VERTEBRAES: x LEVELS**

**VETERBRAES ENUMERATION: T<sub>x</sub>-L<sub>x</sub>-L<sub>x</sub>**

|                                    |                                                                                          |
|------------------------------------|------------------------------------------------------------------------------------------|
| SURGERY DURATION FOR EACH VERTEBRA | Vertebra 1: L <sub>x</sub> → <b>XX min</b><br>Vertebra 2: L <sub>x</sub> → <b>XX min</b> |
| TOTAL IMPLANTOLOGY TIME            | XX min                                                                                   |
| TOTAL SURGERY TIME                 | XX min                                                                                   |
| X-Ray SHOOTS                       | Vertebra X= X<br>Vertebra X= <b>X</b>                                                    |
| KIRSHNER REPOSITIONING             | Vertebra X = <b>X</b><br>Vertebra X = <b>X</b>                                           |
| SCREWS REPOSITIONING               | Vertebra X = <b>X</b><br>Vertebra X = <b>X</b>                                           |

### VERTEBRA 1

*Sign the score attributable to each single section*

|                                              |                |                                |                                |               |        |
|----------------------------------------------|----------------|--------------------------------|--------------------------------|---------------|--------|
| Passage of the screw for the pedicle center  | 1              | 2                              | 3                              | 4             | 5      |
| Screws alignment with the vertebral plate    | 1              | 1                              | 3                              | 4             | 5      |
| Screw axis convergence in the sagittal plane | 1              | 2                              | 3                              | 4             | 5      |
| Screw interpenetration in vertebral surface  | CRITICS (>4mm) | RELEVANT (between 3mm and 4mm) | MODERATE (between 2mm and 3mm) | SLIGHT (<2mm) | ABSENT |

### VERTEBRA 2

*Sign the score attributable to each single section*

|                                              |                |                                |                                |               |        |
|----------------------------------------------|----------------|--------------------------------|--------------------------------|---------------|--------|
| Passage of the screw for the pedicle center  | 1              | 2                              | 3                              | 4             | 5      |
| Screws alignment with the vertebral plate    | 1              | 1                              | 3                              | 4             | 5      |
| Screw axis convergence in the sagittal plane | 1              | 2                              | 3                              | 4             | 5      |
| Screw interpenetration in vertebral surface  | CRITICS (>4mm) | RELEVANT (between 3mm and 4mm) | MODERATE (between 2mm and 3mm) | SLIGHT (<2mm) | ABSENT |

### VERTEBRA XXX

.....

.....

**\*) SCORE "1" for "WORST RESULT" and SCORE "5" for "BEST RESULT"**

## **OR2**

### **Online Resource 2: PATIENT DATA SHEETS**

**Article title:** “In vivo” validation of 3D-printed innovative surgical template for lumbar spinal arthrodesis

**Journal name:** Medical & Biological Engineering & Computing

**Author names:** Alessandro Naddeo, Emilio Cataldo, Nicola Narciso, Francesco Naddeo, Nicola Cappetti

**Affiliation and e-mail address of the corresponding author:**

Corresponding Author: Francesco Naddeo

Department of Industrial Engineering, University of Salerno, Via Giovanni Paolo II, 132, 84084 Fisciano, SA,  
Italy

Email: frnaddeo@unisa.it

**SURGERY DATA SHEETS OF PATIENTS THAT HAVE TAKEN PART TO THE CLINICAL TRIAL**

## **Patient code n. 1AZL4L500**

### **Pathology**

- Vertebral stenosis L4-L5
- Median Discal hernia L5-S1 with II degree Modic

### **Surgery**

Decompression e Stabilization L4-L5-S1

**DATA FOR CLINICAL TRIAL OF CUSTOM MADE VERTEBRAL TEMPLATE “SPINE  
SOLUTION”  
“SPINE SOLUTIONS”**

1AZL4L500  
**2 segments**  
No Template L4  
No Template L5

|                                    |                                                                    |
|------------------------------------|--------------------------------------------------------------------|
| Surgery duration for each vertebra | Vertebra 1: L4→ <b>20 min</b><br><br>Vertebra 2: L5→ <b>80 min</b> |
| Surgery duration for implantology  | 100 min                                                            |
| Total surgery duration             | 120 min                                                            |
| X-Ray shots                        | Vertebra 1= <b>7</b><br>Vertebra 2= <b>7</b>                       |
| Kirschner repositioning            | Vertebra 1 = <b>4</b><br>Vertebra 2 = <b>3</b>                     |
| Pedicle screws repositioning       | Vertebra 1 = <b>0</b><br>Vertebra 2 = <b>0</b>                     |

*VERTEBRA 1*

|                                               |                   |                                |                                                                                      |                                                                                       |                                                                                            |
|-----------------------------------------------|-------------------|--------------------------------|--------------------------------------------------------------------------------------|---------------------------------------------------------------------------------------|--------------------------------------------------------------------------------------------|
| Passage of the screw for the pedicle centre   | 1                 | 2                              | 3                                                                                    | 4 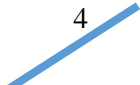 | 5                                                                                          |
| Screws alignment with vertebral plate         | 1                 | 1                              | 3  | 4                                                                                     | 5                                                                                          |
| Screws axis convergence in the sagittal plane | 1                 | 2                              | 3  | 4                                                                                     | 5                                                                                          |
| Screws interpenetration in vertebral surface  | CRITICS<br>(>4mm) | RELEVANT<br>(from 3mm to 4 mm) | MODERATE<br>(from 2mm to 3 mm)                                                       | SLIGHT<br>(<2mm)                                                                      | ABSENT  |

*VERTEBRA 2*

|                                               |                   |                                |                                |                                                                                         |                                                                                              |
|-----------------------------------------------|-------------------|--------------------------------|--------------------------------|-----------------------------------------------------------------------------------------|----------------------------------------------------------------------------------------------|
| Passage of the screw for the pedicle centre   | 1                 | 2                              | 3                              | 4 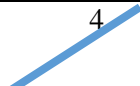   | 5                                                                                            |
| Screws alignment with vertebral plate         | 1                 | 1                              | 3                              | 4   | 5                                                                                            |
| Screws axis convergence in the sagittal plane | 1                 | 2                              | 3                              | 4  | 5                                                                                            |
| Screws interpenetration in vertebral surface  | CRITICS<br>(>4mm) | RELEVANT<br>(from 3mm to 4 mm) | MODERATE<br>(from 2mm to 3 mm) | SLIGHT<br>(<2mm)                                                                        | ABSENT  |

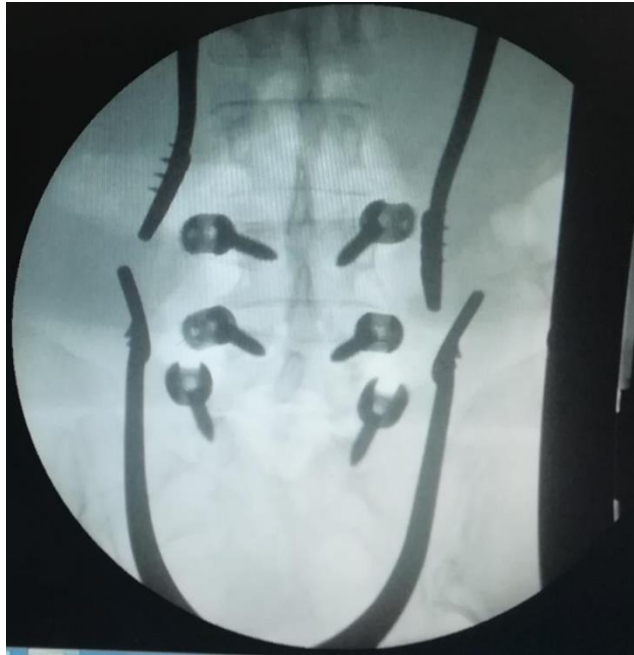

**Fig. 1** *Post-operative coronal X-ray* (n. 1AZL4L500)

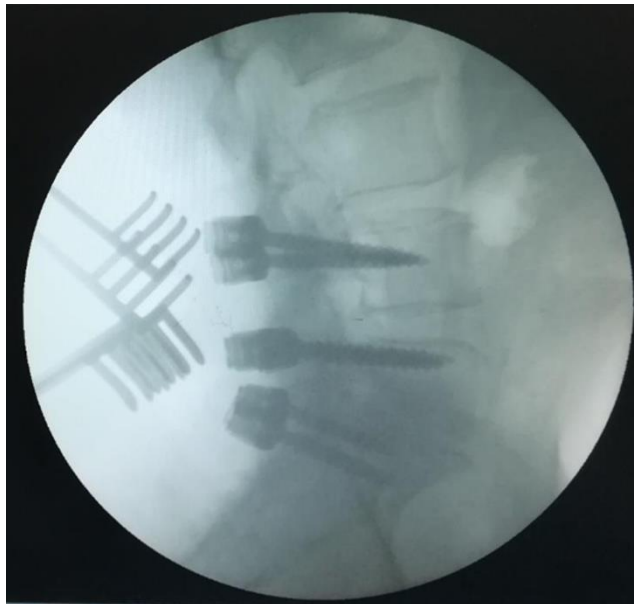

**Fig. 2** *Post-operative sagittal X-ray* (n. 1AZL4L500)

## **Patient code n. 2ATL3L4L5110**

### **Pathology**

- Vertebral stenosis L4-L5
- Medial Discal hernia L3

### **Surgery**

DECOMPRESSION AND STABILIZATION L3-L4-L5



**DATA FOR CLINICAL TRIAL OF CUSTOM MADE VERTEBRAL TEMPLATE “SPINE  
SOLUTION”  
“SPINE SOLUTIONS”**

2ATL3L4L5110

**3 segments**

Template L3

Template L4

No Template L5

|                                    |                                                                                                 |
|------------------------------------|-------------------------------------------------------------------------------------------------|
| Surgery duration for each vertebra | Vertebra 1: L3→ <b>18 min</b><br>Vertebra 2: L4→ <b>15 min</b><br>Vertebra 3: L5→ <b>129min</b> |
| Surgery duration for implantology  | 162 min                                                                                         |
| Total surgery duration             | 185 min                                                                                         |
| X-Ray shots                        | Vertebra 1= <b>4</b><br>Vertebra 2= <b>2</b><br>Vertebra 3= <b>16</b>                           |
| Kirschner repositioning            | Vertebra 1 = <b>1</b><br>Vertebra 2 = <b>0</b><br>Vertebra 3 = <b>12</b>                        |
| Pedicle screws repositioning       | Vertebra 1 = <b>0</b><br>Vertebra 2 = <b>0</b><br>Vertebra 3 = <b>0</b>                         |

*VERTEBRA 1*

|                                               |                   |                                |                                |                                                                                     |                                                                                            |
|-----------------------------------------------|-------------------|--------------------------------|--------------------------------|-------------------------------------------------------------------------------------|--------------------------------------------------------------------------------------------|
| Passage of the screw for the pedicle centre   | 1                 | 2                              | 3                              | 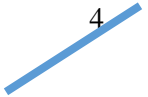 | 5                                                                                          |
| Screws alignment with vertebral plate         | 1                 | 1                              | 3                              | 4                                                                                   |         |
| Screws axis convergence in the sagittal plane | 1                 | 2                              | 3                              |  | 5                                                                                          |
| Screws interpenetration in vertebral surface  | CRITICS<br>(>4mm) | RELEVANT<br>(from 3mm to 4 mm) | MODERATE<br>(from 2mm to 3 mm) | SLIGHT<br>(<2mm)                                                                    |  ABSENT |

*VERTEBRA 2*

|                                               |                   |                                |                                |                                                                                       |                                                                                              |
|-----------------------------------------------|-------------------|--------------------------------|--------------------------------|---------------------------------------------------------------------------------------|----------------------------------------------------------------------------------------------|
| Passage of the screw for the pedicle centre   | 1                 | 2                              | 3                              | 4                                                                                     | 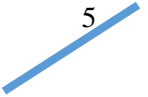          |
| Screws alignment with vertebral plate         | 1                 | 1                              | 3                              |   | 5                                                                                            |
| Screws axis convergence in the sagittal plane | 1                 | 2                              | 3                              |  | 5                                                                                            |
| Screws interpenetration in vertebral surface  | CRITICS<br>(>4mm) | RELEVANT<br>(from 3mm to 4 mm) | MODERATE<br>(from 2mm to 3 mm) | SLIGHT<br>(<2mm)                                                                      |  ABSENT |

*VERTEBRA 3*

|                                               |                     |                                |                                |                  |        |
|-----------------------------------------------|---------------------|--------------------------------|--------------------------------|------------------|--------|
| Passage of the screw for the pedicle centre   | 1                   | 2                              | 3                              | 4                | 5      |
| Screws alignment with vertebral plate         | 1                   | 1                              | 3                              | 4                | 5      |
| Screws axis convergence in the sagittal plane | 1                   | 2                              | 3                              | 4                | 5      |
| Screws interpenetration in vertebral surface  | CRITICALS<br>(>4mm) | RELEVANT<br>(from 3mm to 4 mm) | MODERATE<br>(from 2mm to 3 mm) | SLIGHT<br>(<2mm) | ABSENT |

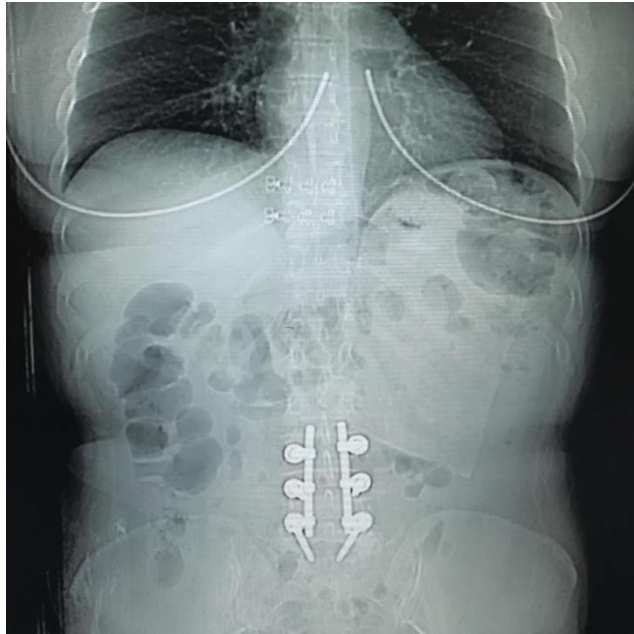

**Fig. 3** Post-operative coronal X-ray (n. 2ATL3L4L5110)

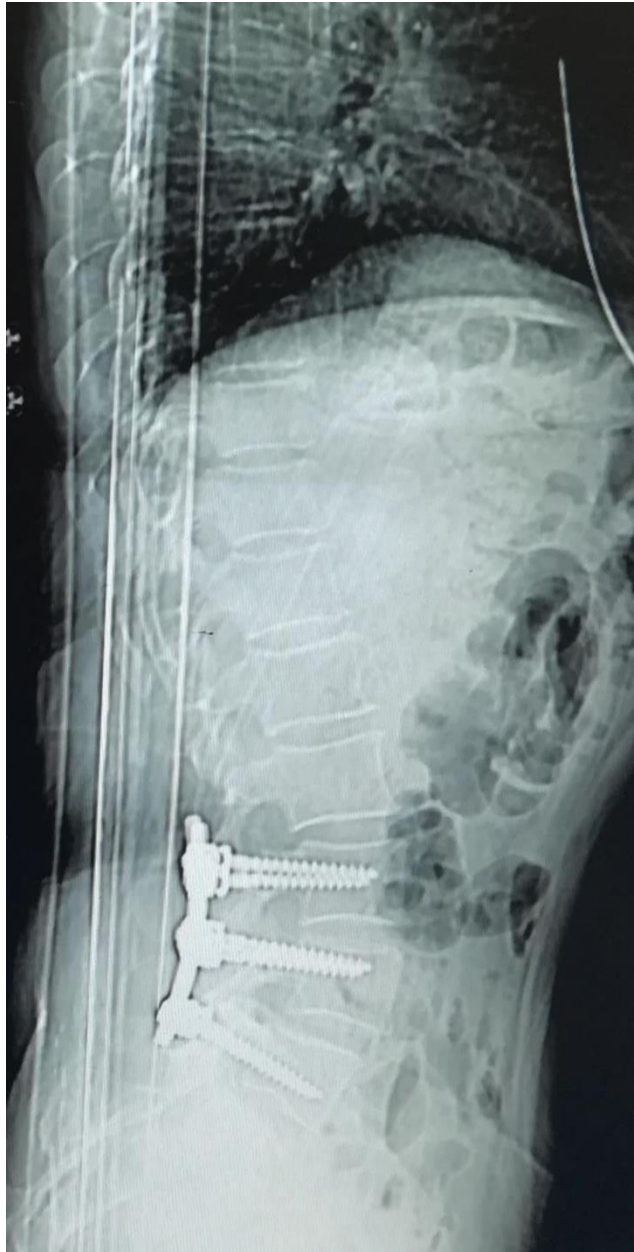

**Fig. 4** Post-operative sagittal X-ray (n. 2ATL3L4L5110)

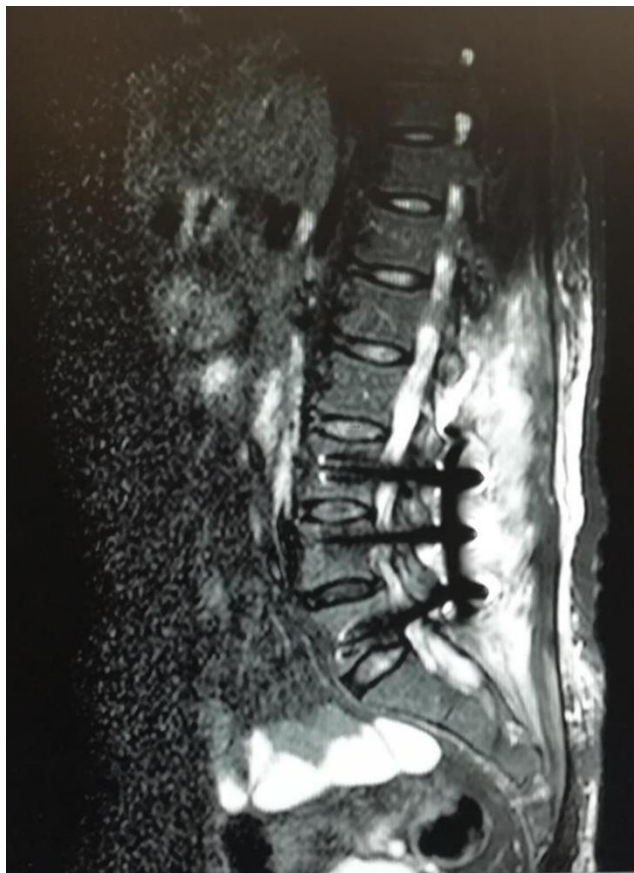

**Fig. 5** Post-operative sagittal RMN (n. 2ATL3L4L5110)

## **Patient code n. 3ANT10T11L1L20110**

### **Pathology**

Vertebral Trauma

- Left pedicle Fracture T12
- costal multiple Fractures
- post-trauma pleural effusion

### **Surgery**

VERTEBRAL ARTRHODESIS T10-L2

**DATA FOR CLINICAL TRIAL OF CUSTOM MADE VERTEBRAL TEMPLATE “SPINE  
SOLUTION”  
“SPINE SOLUTIONS”**

3ANT10T11L1L20110

**4 segments**

No Template T10

Template T11

Template L1

No Template L2

|                                    |                                                                                                                                   |
|------------------------------------|-----------------------------------------------------------------------------------------------------------------------------------|
| Surgery duration for each vertebra | Vertebra 1: T10→ <b>45 min</b><br>Vertebra 2: T11→ <b>10 min</b><br>Vertebra 3: L1→ <b>15min</b><br>Vertebra 4: L2→ <b>70 min</b> |
| Surgery duration for implantology  | 140 min                                                                                                                           |
| Total surgery duration             | 165 min                                                                                                                           |
| X-Ray shots                        | Vertebra 1 = <b>6</b><br>Vertebra 2 = <b>2</b><br>Vertebra 3 = <b>4</b><br>Vertebra 4 = <b>9</b>                                  |
| Kirschner repositioning            | Vertebra 1 = <b>4</b><br>Vertebra 2 = <b>0</b><br>Vertebra 3 = <b>1</b><br>Vertebra 4 = <b>8</b>                                  |
| Pedicle screws repositioning       | Vertebra 1 = <b>0</b><br>Vertebra 2 = <b>0</b><br>Vertebra 3 = <b>0</b><br>Vertebra 4 = <b>1</b>                                  |



*VERTEBRA 1*

|                                               |                   |                                |                                                                                     |                                                                                       |                                                                                            |
|-----------------------------------------------|-------------------|--------------------------------|-------------------------------------------------------------------------------------|---------------------------------------------------------------------------------------|--------------------------------------------------------------------------------------------|
| Passage of the screw for the pedicle centre   | 1                 | 2                              | 3 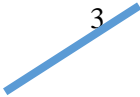 | 4                                                                                     | 5                                                                                          |
| Screws alignment with vertebral plate         | 1                 | 1                              | 3                                                                                   | 4  | 5                                                                                          |
| Screws axis convergence in the sagittal plane | 1                 | 2                              | 3                                                                                   | 4  | 5                                                                                          |
| Screws interpenetration in vertebral surface  | CRITICS<br>(>4mm) | RELEVANT<br>(from 3mm to 4 mm) | MODERATE<br>(from 2mm to 3 mm)                                                      | SLIGHT<br>(<2mm)                                                                      | ABSENT  |

*VERTEBRA 2*

|                                               |                   |                                |                                                                                       |                                                                                        |                                                                                              |
|-----------------------------------------------|-------------------|--------------------------------|---------------------------------------------------------------------------------------|----------------------------------------------------------------------------------------|----------------------------------------------------------------------------------------------|
| Passage of the screw for the pedicle centre   | 1                 | 2                              | 3 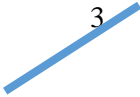   | 4                                                                                      | 5                                                                                            |
| Screws alignment with vertebral plate         | 1                 | 1                              | 3                                                                                     | 4  | 5                                                                                            |
| Screws axis convergence in the sagittal plane | 1                 | 2                              | 3  | 4                                                                                      | 5                                                                                            |
| Screws interpenetration in vertebral surface  | CRITICS<br>(>4mm) | RELEVANT<br>(from 3mm to 4 mm) | MODERATE<br>(from 2mm to 3 mm)                                                        | SLIGHT<br>(<2mm)                                                                       | ABSENT  |

*VERTEBRA 3*

|                                               |                   |                                |                                                                                   |                                                                                     |                                                                                               |
|-----------------------------------------------|-------------------|--------------------------------|-----------------------------------------------------------------------------------|-------------------------------------------------------------------------------------|-----------------------------------------------------------------------------------------------|
| Passage of the screw for the pedicle centre   | 1                 | 2                              | 3                                                                                 | 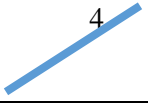 | 5                                                                                             |
| Screws alignment with vertebral plate         | 1                 | 1                              |  | 4                                                                                   | 5                                                                                             |
| Screws axis convergence in the sagittal plane | 1                 | 2                              |  | 4                                                                                   | 5                                                                                             |
| Screws interpenetration in vertebral surface  | CRITICS<br>(>4mm) | RELEVANT<br>(from 3mm to 4 mm) | MODERATE<br>(from 2mm to 3 mm)                                                    | SLIGHT<br>(<2mm)                                                                    | <br>ABSENT |

*VERTEBRA 4*

|                                               |                   |                                |                                |                                                                                       |                                                                                                 |
|-----------------------------------------------|-------------------|--------------------------------|--------------------------------|---------------------------------------------------------------------------------------|-------------------------------------------------------------------------------------------------|
| Passage of the screw for the pedicle centre   | 1                 | 2                              | 3                              | 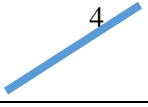   | 5                                                                                               |
| Screws alignment with vertebral plate         | 1                 | 1                              | 3                              | 4                                                                                     |             |
| Screws axis convergence in the sagittal plane | 1                 | 2                              | 3                              |  | 5                                                                                               |
| Screws interpenetration in vertebral surface  | CRITICS<br>(>4mm) | RELEVANT<br>(from 3mm to 4 mm) | MODERATE<br>(from 2mm to 3 mm) | SLIGHT<br>(<2mm)                                                                      | <br>ABSENT |

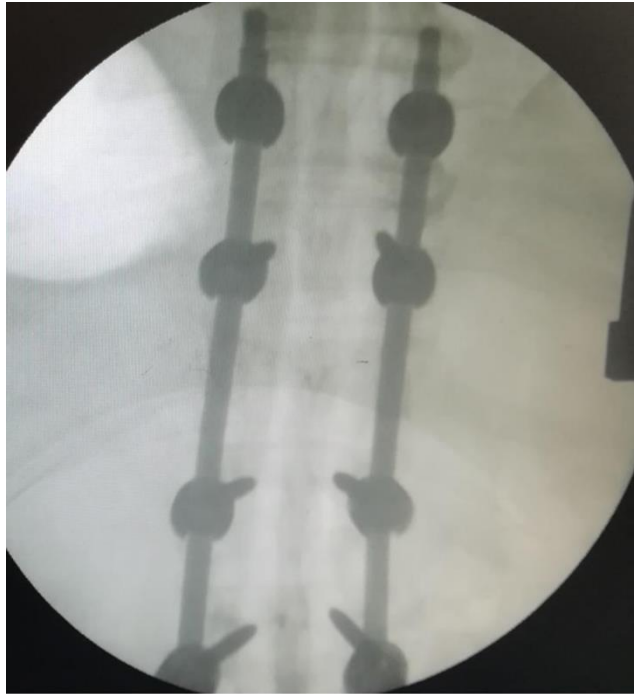

**Fig. 6** Post-operative coronal X-ray (n. 3ANT10T11L1L20110)

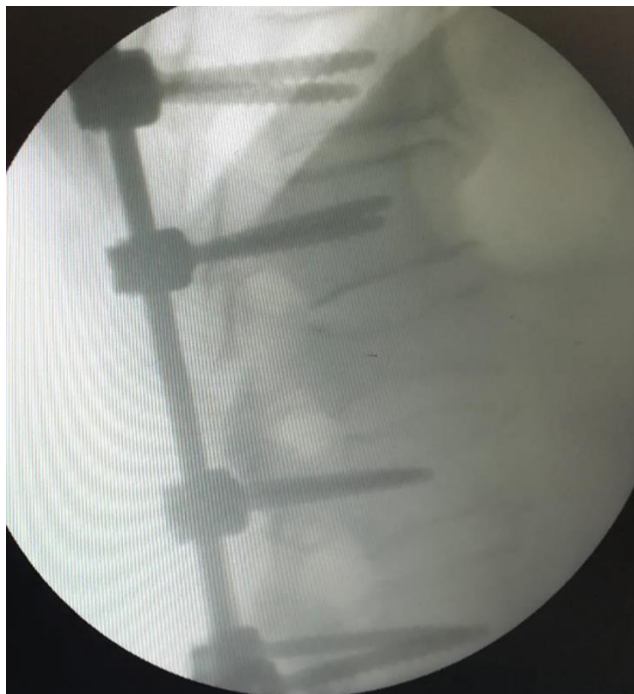

**Fig. 7:** Post-operative sagittal X-ray (n. 3ANT10T11L1L20110)

## **Patient code n. 4ASL3L4L5010**

### **Pathology**

- lumbar Vertebral stenosis
- Spondylosis L4-L5

### **Surgery**

LUMBAR AND LUMBO – SACRAL POSTERIOR ARTRHODESIS AND CANAL DECOMPRESSION

**DATA FOR CLINICAL TRIAL OF CUSTOM MADE VERTEBRAL TEMPLATE “SPINE  
SOLUTION”  
“SPINE SOLUTIONS”**

4ASL3L4L5010

**3 segments**

No Template L3

Template l4

No Template l5

|                                    |                                                                                                        |
|------------------------------------|--------------------------------------------------------------------------------------------------------|
| Surgery duration for each vertebra | Vertebra 1: L3→ <b>60min</b><br><br>Vertebra 2: L4→ <b>16 min</b><br><br>Vertebra 3: L5→ <b>44 min</b> |
| Surgery duration for implantology  | 120 min                                                                                                |
| Total surgery duration             | 150 min                                                                                                |
| X-Ray shots                        | Vertebra 1 = <b>13</b><br>Vertebra 2 = <b>4</b><br>Vertebra 3 = <b>7</b>                               |
| Kirschner repositioning            | Vertebra 1 = <b>10</b><br>Vertebra 2 = <b>0</b><br>Vertebra 3 = <b>4</b>                               |
| Pedicle screws repositioning       | Vertebra 1 = <b>0</b><br>Vertebra 2 = <b>0</b><br>Vertebra 3 = <b>0</b>                                |

*VERTEBRA 1*

|                                               |                   |                                |                                |                                                                                       |                                                                                            |
|-----------------------------------------------|-------------------|--------------------------------|--------------------------------|---------------------------------------------------------------------------------------|--------------------------------------------------------------------------------------------|
| Passage of the screw for the pedicle centre   | 1                 | 2                              | 3                              | 4 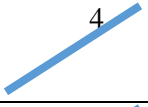 | 5                                                                                          |
| Screws alignment with vertebral plate         | 1                 | 1                              | 3                              | 4  | 5                                                                                          |
| Screws axis convergence in the sagittal plane | 1                 | 2                              | 3                              | 4  | 5                                                                                          |
| Screws interpenetration in vertebral surface  | CRITICS<br>(>4mm) | RELEVANT<br>(from 3mm to 4 mm) | MODERATE<br>(from 2mm to 3 mm) | SLIGHT<br>(<2mm)                                                                      | ABSENT  |

*VERTEBRA 2*

|                                               |                   |                                |                                |                  |                                                                                              |
|-----------------------------------------------|-------------------|--------------------------------|--------------------------------|------------------|----------------------------------------------------------------------------------------------|
| Passage of the screw for the pedicle centre   | 1                 | 2                              | 3                              | 4                | 5 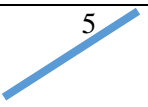        |
| Screws alignment with vertebral plate         | 1                 | 1                              | 3                              | 4                | 5        |
| Screws axis convergence in the sagittal plane | 1                 | 2                              | 3                              | 4                | 5       |
| Screws interpenetration in vertebral surface  | CRITICS<br>(>4mm) | RELEVANT<br>(from 3mm to 4 mm) | MODERATE<br>(from 2mm to 3 mm) | SLIGHT<br>(<2mm) | ABSENT  |

*VERTEBRA 3*

|                                               |                     |                                |                                |                  |        |
|-----------------------------------------------|---------------------|--------------------------------|--------------------------------|------------------|--------|
| Passage of the screw for the pedicle centre   | 1                   | 2                              | 3                              | 4                | 5      |
| Screws alignment with vertebral plate         | 1                   | 1                              | 3                              | 4                | 5      |
| Screws axis convergence in the sagittal plane | 1                   | 2                              | 3                              | 4                | 5      |
| Screws interpenetration in vertebral surface  | CRITICALS<br>(>4mm) | RELEVANT<br>(from 3mm to 4 mm) | MODERATE<br>(from 2mm to 3 mm) | SLIGHT<br>(<2mm) | ABSENT |

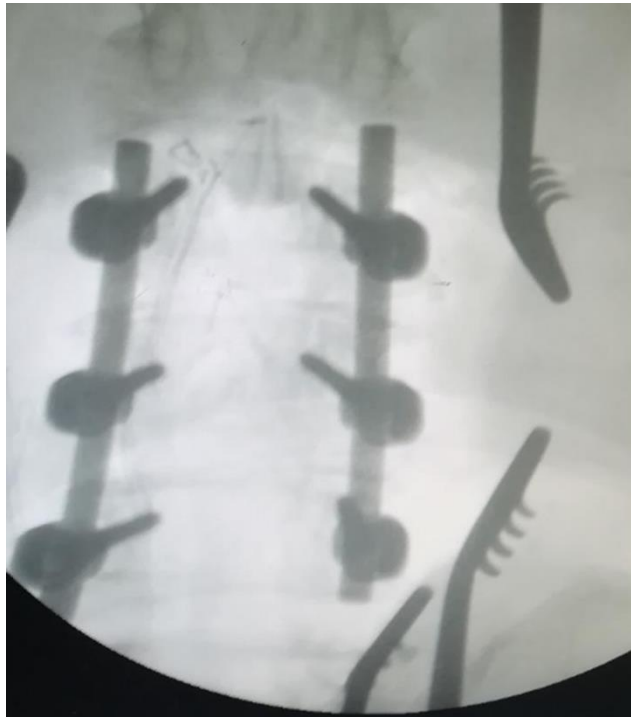

**Fig. 8** Post-operative coronal X-ray (n. 4ASL3L4L5010)

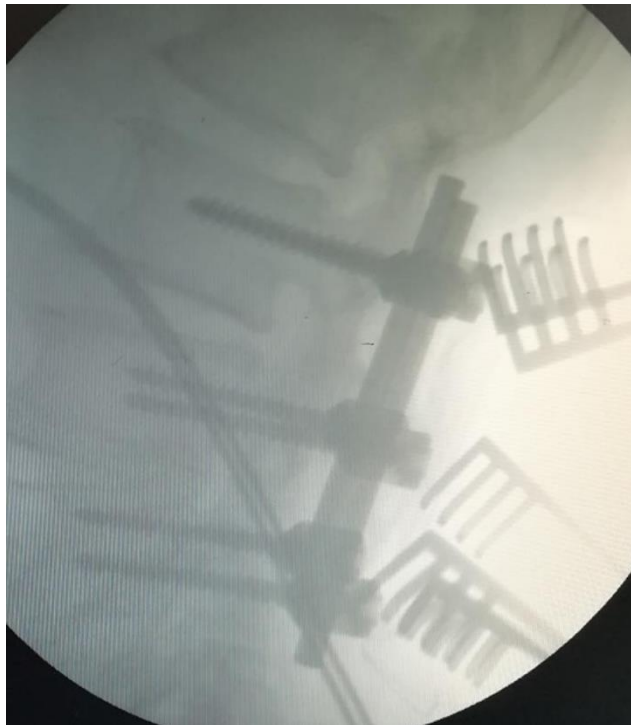

**Fig. 9** Post-operative sagittal X-ray (n. 4ASL3L4L5010)



## **Patient code n. 5BML4L501**

### **Pathology**

Back pain with left sciatica radiation

### **Surgery**

RECALIBRAGE AND BILATERAL LUMBAR ARTRHODESIS IN L4 E L5

**DATA FOR CLINICAL TRIAL OF CUSTOM MADE VERTEBRAL TEMPLATE “SPINE  
SOLUTION”  
“SPINE SOLUTIONS”**

5BML4L501  
**2 segments**  
 No Template L4  
 Template L5

|                                    |                                                                                  |
|------------------------------------|----------------------------------------------------------------------------------|
| Surgery duration for each vertebra | Vertebra 1: L4→ <b>70 min</b><br>Vertebra 2: L5→ <b>10 min</b><br>Vertebra 3: No |
| Surgery duration for implantology  | 80 min                                                                           |
| Total surgery duration             | 110 min                                                                          |
| X-Ray shots                        | Vertebra 1 = <b>12</b><br>Vertebra 2 = <b>3</b><br>Vertebra 3 = No               |
| Kirschner repositioning            | Vertebra 1 = <b>8</b><br>Vertebra 2 = <b>2</b><br>Vertebra 3 = No                |
| Pedicle screws repositioning       | Vertebra 1 = <b>0</b><br>Vertebra 2 = <b>0</b><br>Vertebra 3 = No                |

*VERTEBRA 1*

|                                               |                   |                                |                                |                  |        |
|-----------------------------------------------|-------------------|--------------------------------|--------------------------------|------------------|--------|
| Passage of the screw for the pedicle centre   | 1                 | 2                              | 3                              | 4                | 5      |
| Screws alignment with vertebral plate         | 1                 | 1                              | 3                              | 4                | 5      |
| Screws axis convergence in the sagittal plane | 1                 | 2                              | 3                              | 4                | 5      |
| Screws interpenetration in vertebral surface  | CRITICS<br>(>4mm) | RELEVANT<br>(from 3mm to 4 mm) | MODERATE<br>(from 2mm to 3 mm) | SLIGHT<br>(<2mm) | ABSENT |

*VERTEBRA 2*

|                                               |                   |                                |                                |                  |        |
|-----------------------------------------------|-------------------|--------------------------------|--------------------------------|------------------|--------|
| Passage of the screw for the pedicle centre   | 1                 | 2                              | 3                              | 4                | 5      |
| Screws alignment with vertebral plate         | 1                 | 1                              | 3                              | 4                | 5      |
| Screws axis convergence in the sagittal plane | 1                 | 2                              | 3                              | 4                | 5      |
| Screws interpenetration in vertebral surface  | CRITICS<br>(>4mm) | RELEVANT<br>(from 3mm to 4 mm) | MODERATE<br>(from 2mm to 3 mm) | SLIGHT<br>(<2mm) | ABSENT |

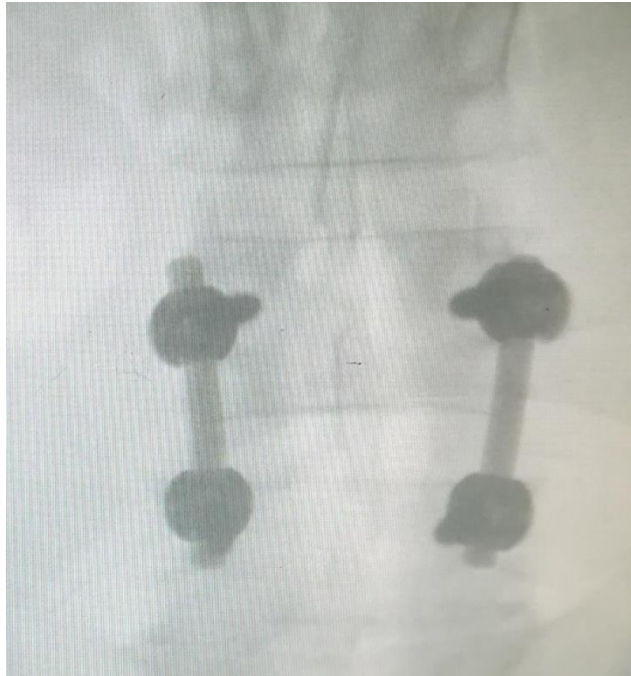

**Fig. 10** Post-operative coronal X-ray (n. 5BML4L501)

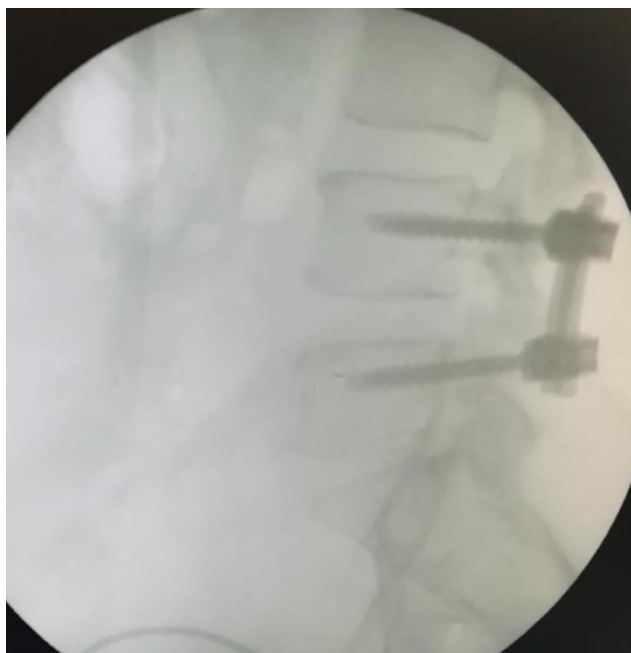

**Fig. 11** Post-operative sagittal X-ray (n. 5BML4L501)

## **Patient code n. 6CVL3L4L5011**

### **Pathology**

- Back pain
- Bilateral sciatica

### **Surgery**

POSTERIOR LUMBAR ARTRHODESIS AND LATERAL DECOMPRESSION L4-L5 E L5-S1

**DATA FOR CLINICAL TRIAL OF CUSTOM MADE VERTEBRAL TEMPLATE “SPINE  
SOLUTION”  
“SPINE SOLUTIONS”**

6CVL3L4L5011

**3 segments**

No Template L3

Template L4

Template L5

|                                    |                                                                                                        |
|------------------------------------|--------------------------------------------------------------------------------------------------------|
| Surgery duration for each vertebra | Vertebra 1: L3→ <b>57 min</b><br><br>Vertebra 2: L4→ <b>15 min</b><br><br>Vertebra 3: L5→ <b>18min</b> |
| Surgery duration for implantology  | 90 min                                                                                                 |
| Total surgery duration             | 115 min                                                                                                |
| X-Ray shots                        | Vertebra 1= <b>10</b><br>Vertebra 2= <b>2</b><br>Vertebra 3= <b>3</b>                                  |
| Kirschner repositioning            | Vertebra 1 = <b>1</b><br>Vertebra 2 = <b>0</b><br>Vertebra 3 = <b>1</b>                                |
| Pedicle screws repositioning       | Vertebra 1 = <b>0</b><br>Vertebra 2 = <b>0</b><br>Vertebra 3 = <b>0</b>                                |

*VERTEBRA 1*

|                                               |                   |                                |                                                                                     |                                                                                       |                                                                                            |
|-----------------------------------------------|-------------------|--------------------------------|-------------------------------------------------------------------------------------|---------------------------------------------------------------------------------------|--------------------------------------------------------------------------------------------|
| Passage of the screw for the pedicle centre   | 1                 | 2                              | 3 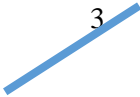 | 4                                                                                     | 5                                                                                          |
| Screws alignment with vertebral plate         | 1                 | 1                              | 3                                                                                   | 4  | 5                                                                                          |
| Screws axis convergence in the sagittal plane | 1                 | 2                              | 3                                                                                   | 4  | 5                                                                                          |
| Screws interpenetration in vertebral surface  | CRITICS<br>(>4mm) | RELEVANT<br>(from 3mm to 4 mm) | MODERATE<br>(from 2mm to 3 mm)                                                      | SLIGHT<br>(<2mm)                                                                      | ABSENT  |

*VERTEBRA 2*

|                                               |                   |                                |                                |                                                                                         |                                                                                              |
|-----------------------------------------------|-------------------|--------------------------------|--------------------------------|-----------------------------------------------------------------------------------------|----------------------------------------------------------------------------------------------|
| Passage of the screw for the pedicle centre   | 1                 | 2                              | 3                              | 4 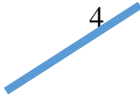   | 5                                                                                            |
| Screws alignment with vertebral plate         | 1                 | 1                              | 3                              | 4                                                                                       | 5        |
| Screws axis convergence in the sagittal plane | 1                 | 2                              | 3                              | 4  | 5                                                                                            |
| Screws interpenetration in vertebral surface  | CRITICS<br>(>4mm) | RELEVANT<br>(from 3mm to 4 mm) | MODERATE<br>(from 2mm to 3 mm) | SLIGHT<br>(<2mm)                                                                        | ABSENT  |

*VERTEBRA 3*

|                                               |                     |                                |                                |                  |        |
|-----------------------------------------------|---------------------|--------------------------------|--------------------------------|------------------|--------|
| Passage of the screw for the pedicle centre   | 1                   | 2                              | 3                              | 4                | 5      |
| Screws alignment with vertebral plate         | 1                   | 1                              | 3                              | 4                | 5      |
| Screws axis convergence in the sagittal plane | 1                   | 2                              | 3                              | 4                | 5      |
| Screws interpenetration in vertebral surface  | CRITICALS<br>(>4mm) | RELEVANT<br>(from 3mm to 4 mm) | MODERATE<br>(from 2mm to 3 mm) | SLIGHT<br>(<2mm) | ABSENT |



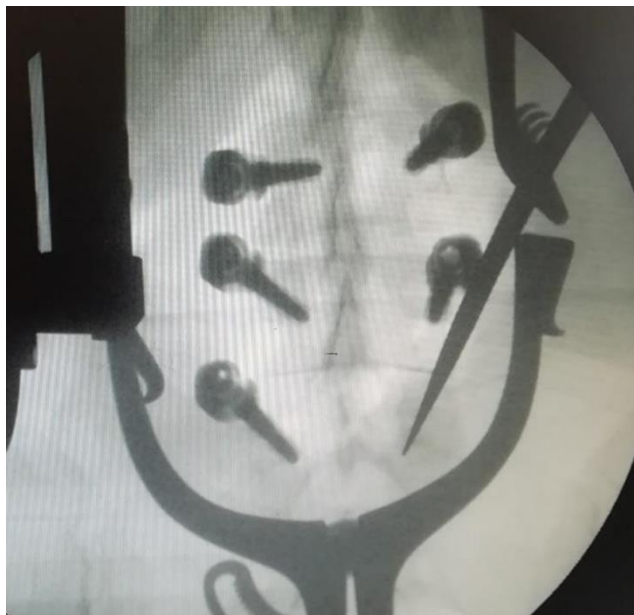

**Fig. 12** Post-operative coronal X-ray (n. 6CVL3L4L5011)

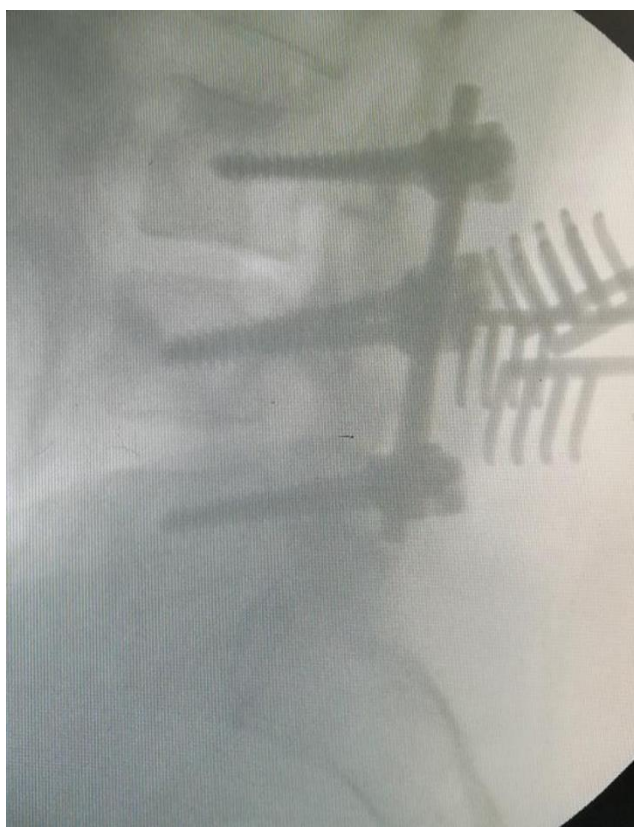

**Fig. 13** Post-operative sagittal X-ray (n. 6CVL3L4L5011)

## **Patient code n. 7CPL1L200**

### **Pathology**

- Vertebral stenosis L1-L2
- Spondilosi and medial discal hernia with II degree Modic
- vertebral neoplasy
- vertebroplasty

### **Surgery**

DECOMPRESSION AND STABILIZATION L1-L2

**DATA FOR CLINICAL TRIAL OF CUSTOM MADE VERTEBRAL TEMPLATE “SPINE  
SOLUTION”  
“SPINE SOLUTIONS”**

7CPL1L200  
**2 segments**  
 No Template L1  
 No Template L2

|                                    |                                                                                  |
|------------------------------------|----------------------------------------------------------------------------------|
| Surgery duration for each vertebra | Vertebra 1: L1→ <b>40 min</b><br>Vertebra 2: L2→ <b>60 min</b><br>Vertebra 3: No |
| Surgery duration for implantology  | 100 min                                                                          |
| Total surgery duration             | 120 min                                                                          |
| X-Ray shots                        | Vertebra 1= <b>8</b><br>Vertebra 2= <b>4</b><br>Vertebra 3= No                   |
| Kirschner repositioning            | Vertebra 1 = <b>3</b><br>Vertebra 2 = <b>2</b><br>Vertebra 3 = No                |
| Pedicle screws repositioning       | Vertebra 1 = <b>0</b><br>Vertebra 2 = <b>0</b><br>Vertebra 3 = No                |

*VERTEBRA 1*

|                                               |                   |                                |                                |                                                                                     |                                                                                     |
|-----------------------------------------------|-------------------|--------------------------------|--------------------------------|-------------------------------------------------------------------------------------|-------------------------------------------------------------------------------------|
| Passage of the screw for the pedicle centre   | 1                 | 2                              | 3                              | 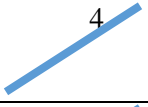 | 5                                                                                   |
| Screws alignment with vertebral plate         | 1                 | 1                              | 3                              |  | 5                                                                                   |
| Screws axis convergence in the sagittal plane | 1                 | 2                              | 3                              |  | 5                                                                                   |
| Screws interpenetration in vertebral surface  | CRITICS<br>(>4mm) | RELEVANT<br>(from 3mm to 4 mm) | MODERATE<br>(from 2mm to 3 mm) | SLIGHT<br>(<2mm)                                                                    |  |

*VERTEBRA 2*

|                                               |                   |                                |                                |                                                                                       |                                                                                       |
|-----------------------------------------------|-------------------|--------------------------------|--------------------------------|---------------------------------------------------------------------------------------|---------------------------------------------------------------------------------------|
| Passage of the screw for the pedicle centre   | 1                 | 2                              | 3                              | 4                                                                                     | 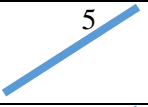   |
| Screws alignment with vertebral plate         | 1                 | 1                              | 3                              | 4                                                                                     |   |
| Screws axis convergence in the sagittal plane | 1                 | 2                              | 3                              |  | 5                                                                                     |
| Screws interpenetration in vertebral surface  | CRITICS<br>(>4mm) | RELEVANT<br>(from 3mm to 4 mm) | MODERATE<br>(from 2mm to 3 mm) | SLIGHT<br>(<2mm)                                                                      |  |

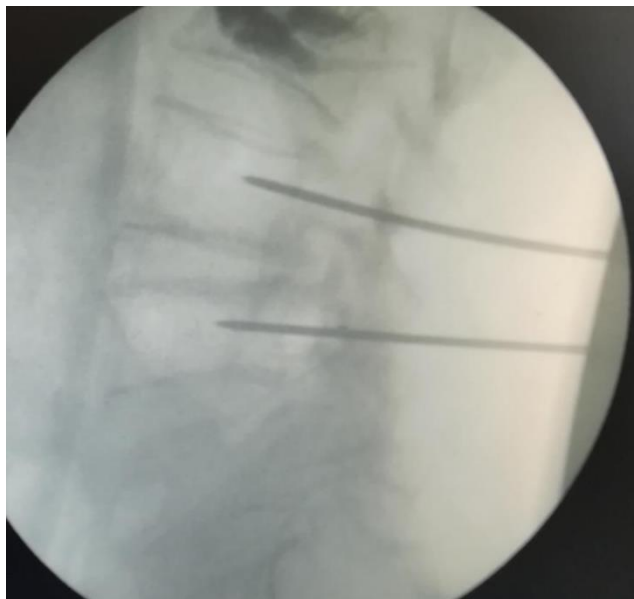

**Fig. 14** Post-operative sagittal X-ray (n. 7CPL1L200)

## **Patient code n. 8FLL1L2L3L41001**

### **Pathology**

- lumbar Spondylolisthesis with L1 collapse
- Vertebral stenosis L3-L4

### **Surgery**

DECOMPRESSION AND STABILIZATION L1-L5

**DATA FOR CLINICAL TRIAL OF CUSTOM MADE VERTEBRAL TEMPLATE “SPINE  
SOLUTION”  
“SPINE SOLUTIONS”**

8FLL1L2L3L41001

**4 segments**

Template L1

No Template L2

No Template L3

Template L4

|                                    |                                                                                                                                             |
|------------------------------------|---------------------------------------------------------------------------------------------------------------------------------------------|
| Surgery duration for each vertebra | Vertebra 1: L1→ <b>10 min</b><br><br>Vertebra 2: L2→ <b>80 min</b><br><br>Vertebra 3: L3→ <b>3 min</b><br><br>Vertebra 4: L4→ <b>17 min</b> |
| Surgery duration for implantology  | 150 min                                                                                                                                     |
| Total surgery duration             | 165 min                                                                                                                                     |
| X-Ray shots                        | Vertebra 1= <b>2</b><br>Vertebra 2= <b>12</b><br>Vertebra 3= <b>6</b><br>Vertebra 4= <b>3</b>                                               |
| Kirschner repositioning            | Vertebra 1 = <b>1</b><br>Vertebra 2 = <b>2</b><br>Vertebra 3 = <b>4</b><br>Vertebra 4= <b>0</b>                                             |
| Pedicle screws repositioning       | Vertebra 1 = <b>0</b><br>Vertebra 2 = <b>0</b><br>Vertebra 3 = <b>0</b><br>Vertebra 4= <b>0</b>                                             |

*VERTEBRA 1*

|                                               |                   |                                |                                                                                     |                                                                                       |                                                                                            |
|-----------------------------------------------|-------------------|--------------------------------|-------------------------------------------------------------------------------------|---------------------------------------------------------------------------------------|--------------------------------------------------------------------------------------------|
| Passage of the screw for the pedicle centre   | 1                 | 2                              | 3 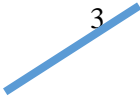 | 4                                                                                     | 5                                                                                          |
| Screws alignment with vertebral plate         | 1                 | 1                              | 3                                                                                   | 4                                                                                     | 5       |
| Screws axis convergence in the sagittal plane | 1                 | 2                              | 3                                                                                   | 4  | 5                                                                                          |
| Screws interpenetration in vertebral surface  | CRITICS<br>(>4mm) | RELEVANT<br>(from 3mm to 4 mm) | MODERATE<br>(from 2mm to 3 mm)                                                      | SLIGHT<br>(<2mm)                                                                      | ABSENT  |

*VERTEBRA 2*

|                                               |                   |                                |                                                                                       |                                                                                                        |        |
|-----------------------------------------------|-------------------|--------------------------------|---------------------------------------------------------------------------------------|--------------------------------------------------------------------------------------------------------|--------|
| Passage of the screw for the pedicle centre   | 1                 | 2                              | 3                                                                                     | 4 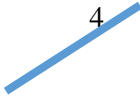                  | 5      |
| Screws alignment with vertebral plate         | 1                 | 1                              | 3   | 4                                                                                                      | 5      |
| Screws axis convergence in the sagittal plane | 1                 | 2                              | 3  | 4                                                                                                      | 5      |
| Screws interpenetration in vertebral surface  | CRITICS<br>(>4mm) | RELEVANT<br>(from 3mm to 4 mm) | MODERATE<br>(from 2mm to 3 mm)                                                        | SLIGHT<br>(<2mm)  | ABSENT |



*VERTEBRA 3*

|                                               |                   |                                |                                                                                   |                                                                                     |                                                                                            |
|-----------------------------------------------|-------------------|--------------------------------|-----------------------------------------------------------------------------------|-------------------------------------------------------------------------------------|--------------------------------------------------------------------------------------------|
| Passage of the screw for the pedicle centre   | 1                 | 2                              | 3                                                                                 | 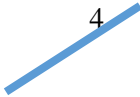 | 5                                                                                          |
| Screws alignment with vertebral plate         | 1                 | 1                              |  | 4                                                                                   | 5                                                                                          |
| Screws axis convergence in the sagittal plane | 1                 | 2                              | 3                                                                                 |  | 5                                                                                          |
| Screws interpenetration in vertebral surface  | CRITICS<br>(>4mm) | RELEVANT<br>(from 3mm to 4 mm) | MODERATE<br>(from 2mm to 3 mm)                                                    | SLIGHT<br>(<2mm)                                                                    |  ABSENT |

*VERTEBRA 4*

|                                               |                   |                                |                                |                                                                                       |                                                                                              |
|-----------------------------------------------|-------------------|--------------------------------|--------------------------------|---------------------------------------------------------------------------------------|----------------------------------------------------------------------------------------------|
| Passage of the screw for the pedicle centre   | 1                 | 2                              | 3                              | 4                                                                                     | 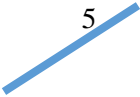          |
| Screws alignment with vertebral plate         | 1                 | 1                              | 3                              | 4                                                                                     |          |
| Screws axis convergence in the sagittal plane | 1                 | 2                              | 3                              |  | 5                                                                                            |
| Screws interpenetration in vertebral surface  | CRITICS<br>(>4mm) | RELEVANT<br>(from 3mm to 4 mm) | MODERATE<br>(from 2mm to 3 mm) | SLIGHT<br>(<2mm)                                                                      |  ABSENT |

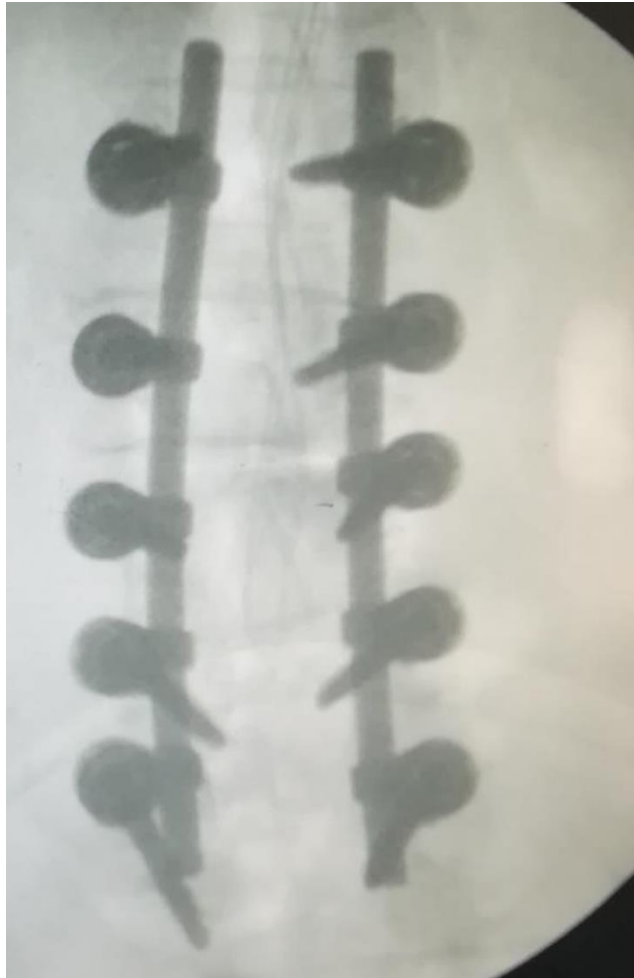

**Fig. 15** Post-operative coronal X-ray (n. 8FLL1L2L3L41001)

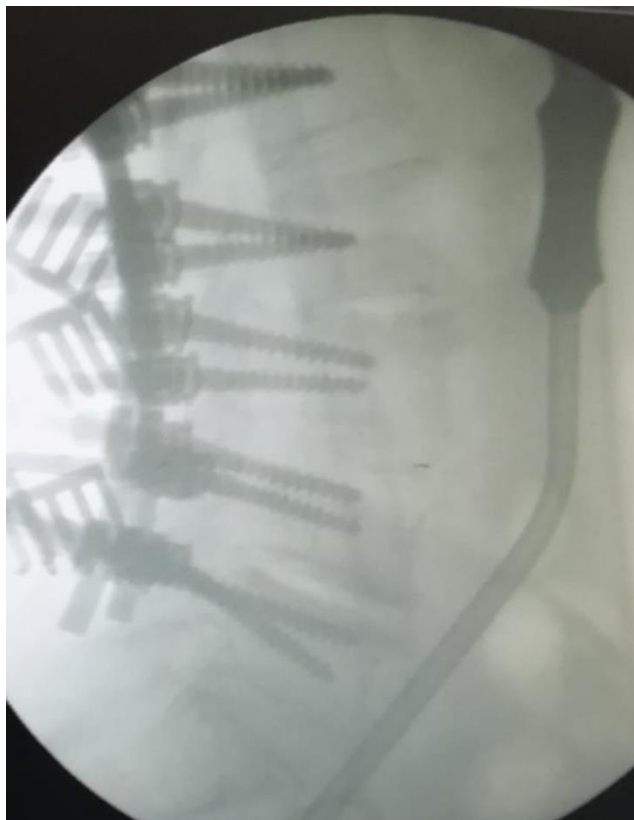

**Fig. 16** Post-operative sagittal X-ray (n. 8FLL1L2L3L41001)

## **Patient code n. 9LVL2L3L4L51100**

### **Pathology**

- Lumbar Stenosis from L2 to S1
- Right L2-L3 discal hernia L2-L3 and medial left discal hernia L4-L5 and median S1

### **Surgery**

BILATERAL DECOMPRESSION AND STABILIZATION WITH PEDICLE SCREWS AND LATERAL RODS IMPLANTOLOGY (L5 CANNOT BE TRHEATED FOR SERIOUS OSTEOPOROSIS)

**DATA FOR CLINICAL TRIAL OF CUSTOM MADE VERTEBRAL TEMPLATE “SPINE  
SOLUTION”  
“SPINE SOLUTIONS”**

9LVL2L3L4L51100

**4 segments**

Template L2

Template L3

No Template L4

No Template L5

|                                    |                                                                                                                                              |
|------------------------------------|----------------------------------------------------------------------------------------------------------------------------------------------|
| Surgery duration for each vertebra | Vertebra 1: L2→ <b>15 min</b><br><br>Vertebra 2: L3→ <b>11 min</b><br><br>Vertebra 3: L4→ <b>39 min</b><br><br>Vertebra 4: L5→ <b>25 min</b> |
| Surgery duration for implantology  | 90 min                                                                                                                                       |
| Total surgery duration             | 110 min                                                                                                                                      |
| X-Ray shots                        | Vertebra 1= <b>2</b><br>Vertebra 2= <b>1</b><br>Vertebra 3= <b>10</b><br>Vertebra 4= <b>5</b>                                                |
| Kirschner repositioning            | Vertebra 1 = <b>0</b><br>Vertebra 2 = <b>0</b><br>Vertebra 3 = <b>7</b><br>Vertebra 4= <b>3</b>                                              |
| Pedicle screws repositioning       | Vertebra 1 = <b>0</b><br>Vertebra 2 = <b>0</b><br>Vertebra 3 = <b>0</b><br>Vertebra 4= <b>0</b>                                              |

*VERTEBRA 1*

|                                               |                   |                                |                                |                  |        |
|-----------------------------------------------|-------------------|--------------------------------|--------------------------------|------------------|--------|
| Passage of the screw for the pedicle centre   | 1                 | 2                              | 3                              | 4                | 5      |
| Screws alignment with vertebral plate         | 1                 | 1                              | 3                              | 4                | 5      |
| Screws axis convergence in the sagittal plane | 1                 | 2                              | 3                              | 4                | 5      |
| Screws interpenetration in vertebral surface  | CRITICS<br>(>4mm) | RELEVANT<br>(from 3mm to 4 mm) | MODERATE<br>(from 2mm to 3 mm) | SLIGHT<br>(<2mm) | ABSENT |

*VERTEBRA 2*

|                                               |                   |                                |                                |                  |        |
|-----------------------------------------------|-------------------|--------------------------------|--------------------------------|------------------|--------|
| Passage of the screw for the pedicle centre   | 1                 | 2                              | 3                              | 4                | 5      |
| Screws alignment with vertebral plate         | 1                 | 1                              | 3                              | 4                | 5      |
| Screws axis convergence in the sagittal plane | 1                 | 2                              | 3                              | 4                | 5      |
| Screws interpenetration in vertebral surface  | CRITICS<br>(>4mm) | RELEVANT<br>(from 3mm to 4 mm) | MODERATE<br>(from 2mm to 3 mm) | SLIGHT<br>(<2mm) | ABSENT |

*VERTEBRA 3*

|                                               |                   |                                |                                |                                                                                       |                                                                                            |
|-----------------------------------------------|-------------------|--------------------------------|--------------------------------|---------------------------------------------------------------------------------------|--------------------------------------------------------------------------------------------|
| Passage of the screw for the pedicle centre   | 1                 | 2                              | 3                              | 4                                                                                     | 5 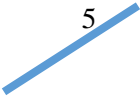      |
| Screws alignment with vertebral plate         | 1                 | 1                              | 3                              | 4  | 5                                                                                          |
| Screws axis convergence in the sagittal plane | 1                 | 2                              | 3                              | 4  | 5                                                                                          |
| Screws interpenetration in vertebral surface  | CRITICS<br>(>4mm) | RELEVANT<br>(from 3mm to 4 mm) | MODERATE<br>(from 2mm to 3 mm) | SLIGHT<br>(<2mm)                                                                      | ABSENT  |

*VERTEBRA 4*

|                                               |                   |                                |                                |                                                                                       |                                                                                              |
|-----------------------------------------------|-------------------|--------------------------------|--------------------------------|---------------------------------------------------------------------------------------|----------------------------------------------------------------------------------------------|
| Passage of the screw for the pedicle centre   | 1                 | 2                              | 3                              | 4 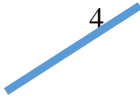 | 5                                                                                            |
| Screws alignment with vertebral plate         | 1                 | 1                              | 3                              | 4                                                                                     | 5        |
| Screws axis convergence in the sagittal plane | 1                 | 2                              | 3                              | 4                                                                                     | 5       |
| Screws interpenetration in vertebral surface  | CRITICS<br>(>4mm) | RELEVANT<br>(from 3mm to 4 mm) | MODERATE<br>(from 2mm to 3 mm) | SLIGHT<br>(<2mm)                                                                      | ABSENT  |

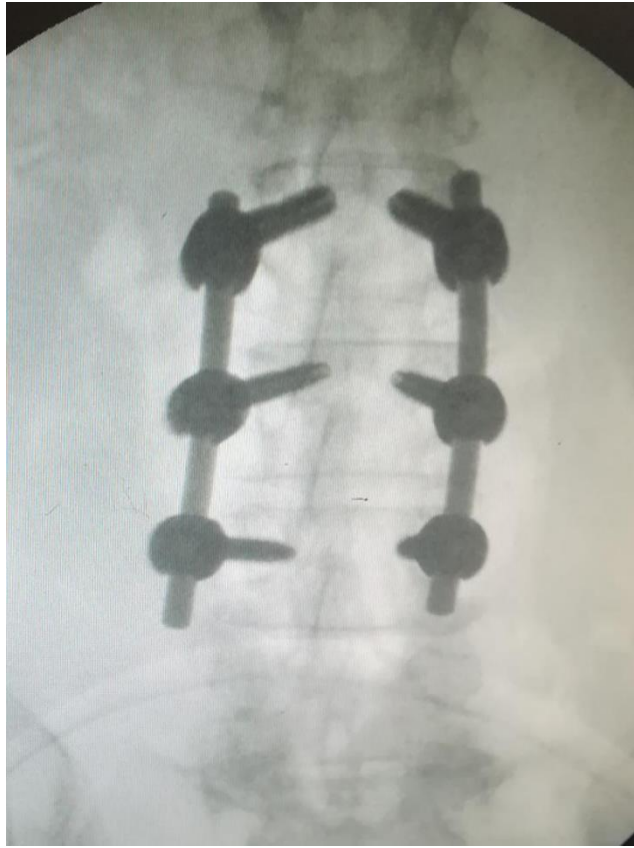

**Fig. 17** Post-operative coronal X-ray (n. 9LVL2L3L4L51100)

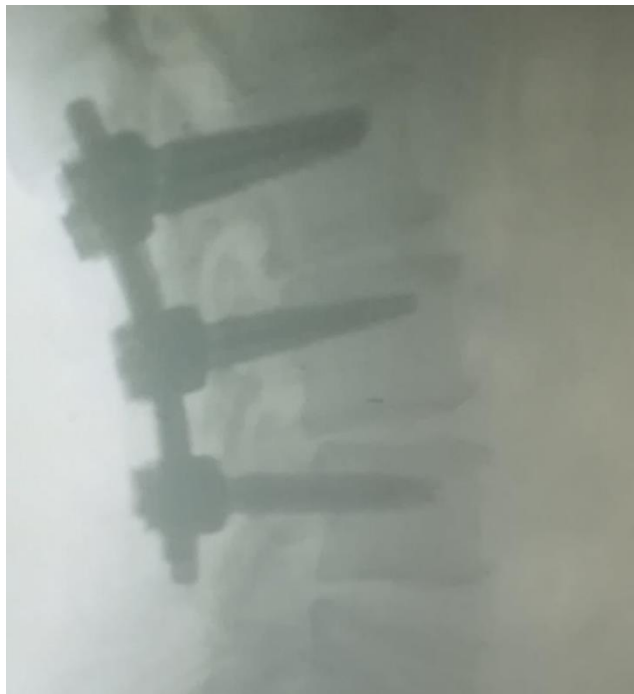

**Fig. 18** Post-operative sagittal X-ray (n. 9LVL2L3L4L51100)



## **Patient code n. 10PCL3L4L5001**

### **Pathology**

- Vertebral stenosis
- multiple discopathy
- plurisegmentary instability
- LUMBAR SPONDYLOSIS

### **Surgery**

DECOMPRESSIVE LAMINECTOMY OF L5 SEGMENT AND LATERAL DECOMPRESSION OF L4-L5  
AND L3-L4

**DATA FOR CLINICAL TRIAL OF CUSTOM MADE VERTEBRAL TEMPLATE “SPINE  
SOLUTION”  
“SPINE SOLUTIONS”**

10CPL3L4L5001

**3 segments**

No Template L3

No Template L4

Template L5

|                                    |                                                                                                 |
|------------------------------------|-------------------------------------------------------------------------------------------------|
| Surgery duration for each vertebra | Vertebra 1: L3→ <b>22 min</b><br>Vertebra 2: L4→ <b>38 min</b><br>Vertebra 3: L5→ <b>48 min</b> |
| Surgery duration for implantology  | 108 min                                                                                         |
| Total surgery duration             | 128 min                                                                                         |
| X-Ray shots                        | Vertebra 1= <b>3</b><br>Vertebra 2= <b>20</b><br>Vertebra 3= <b>12</b>                          |
| Kirschner repositioning            | Vertebra 1 = <b>1</b><br>Vertebra 2 = <b>4</b><br>Vertebra 3 = <b>2</b>                         |
| Pedicle screws repositioning       | Vertebra 1 = <b>0</b><br>Vertebra 2 = <b>1</b><br>Vertebra 3 = <b>0</b>                         |

*VERTEBRA 1*

|                                               |                   |                                |                                                                                     |                                                                                       |                                                                                            |
|-----------------------------------------------|-------------------|--------------------------------|-------------------------------------------------------------------------------------|---------------------------------------------------------------------------------------|--------------------------------------------------------------------------------------------|
| Passage of the screw for the pedicle centre   | 1                 | 2                              | 3  | 4                                                                                     | 5                                                                                          |
| Screws alignment with vertebral plate         | 1                 | 1                              | 3                                                                                   | 4  | 5                                                                                          |
| Screws axis convergence in the sagittal plane | 1                 | 2                              | 3                                                                                   | 4  | 5                                                                                          |
| Screws interpenetration in vertebral surface  | CRITICS<br>(>4mm) | RELEVANT<br>(from 3mm to 4 mm) | MODERATE<br>(from 2mm to 3 mm)                                                      | SLIGHT<br>(<2mm)                                                                      | ABSENT  |

*VERTEBRA 2*

|                                               |                   |                                |                                |                                                                                         |                                                                                              |
|-----------------------------------------------|-------------------|--------------------------------|--------------------------------|-----------------------------------------------------------------------------------------|----------------------------------------------------------------------------------------------|
| Passage of the screw for the pedicle centre   | 1                 | 2                              | 3                              | 4 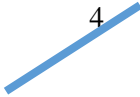   | 5                                                                                            |
| Screws alignment with vertebral plate         | 1                 | 1                              | 3                              | 4   | 5                                                                                            |
| Screws axis convergence in the sagittal plane | 1                 | 2                              | 3                              | 4  | 5                                                                                            |
| Screws interpenetration in vertebral surface  | CRITICS<br>(>4mm) | RELEVANT<br>(from 3mm to 4 mm) | MODERATE<br>(from 2mm to 3 mm) | SLIGHT<br>(<2mm)                                                                        | ABSENT  |

*VERTEBRA 3*

|                                               |                     |                                |                                |                  |        |
|-----------------------------------------------|---------------------|--------------------------------|--------------------------------|------------------|--------|
| Passage of the screw for the pedicle centre   | 1                   | 2                              | 3                              | 4                | 5      |
| Screws alignment with vertebral plate         | 1                   | 1                              | 3                              | 4                | 5      |
| Screws axis convergence in the sagittal plane | 1                   | 2                              | 3                              | 4                | 5      |
| Screws interpenetration in vertebral surface  | CRITICALS<br>(>4mm) | RELEVANT<br>(from 3mm to 4 mm) | MODERATE<br>(from 2mm to 3 mm) | SLIGHT<br>(<2mm) | ABSENT |

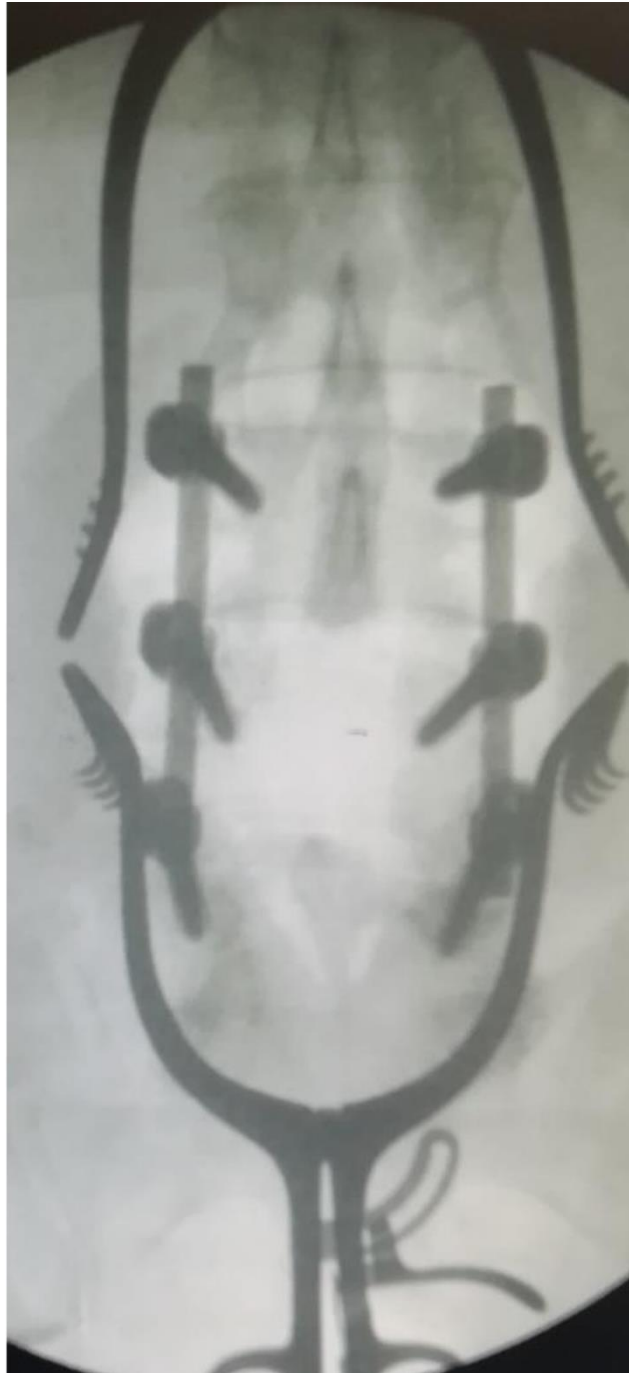

**Fig. 19** Post-operative coronal X-ray (n. 10PCL3L4L5001)

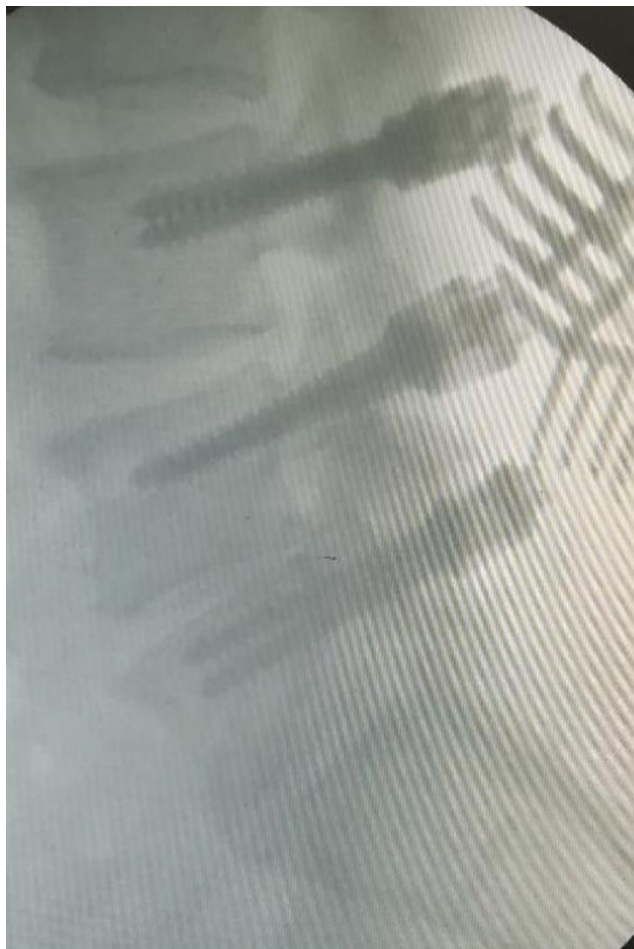

**Fig. 20** Post-operative sagittal X-ray (n. 10PCL3L4L5001)

## **Patient code n. 11SAL4L510**

### **Pathology**

- LEFT lumbosciatica
- LEFT radiculitis

### **Surgery**

LATERAL L4- L5DECOMPRESSION AND POSTERIOR ARTHRODESIS

**DATA FOR CLINICAL TRIAL OF CUSTOM MADE VERTEBRAL TEMPLATE “SPINE  
SOLUTION”  
“SPINE SOLUTIONS”**

11SAL4L510  
**2 segments**  
 Template L4  
 No Template L5

|                                    |                                                                                         |
|------------------------------------|-----------------------------------------------------------------------------------------|
| Surgery duration for each vertebra | Vertebra 1: L4→ <b>8 min</b><br><br>Vertebra 2: L4→ <b>52 min</b><br><br>Vertebra 3: No |
| Surgery duration for implantology  | 60 min                                                                                  |
| Total surgery duration             | 80 min                                                                                  |
| X-Ray shots                        | Vertebra 1= <b>4</b><br>Vertebra 2= <b>12</b><br>Vertebra 3= No                         |
| Kirschner repositioning            | Vertebra 1 = <b>0</b><br>Vertebra 2 = <b>6</b><br>Vertebra 3 = No                       |
| Pedicle screws repositioning       | Vertebra 1 = <b>0</b><br>Vertebra 2 = <b>0</b><br>Vertebra 3 = No                       |



*VERTEBRA 1*

|                                               |                   |                                |                                |                                                                                     |                                                                                            |
|-----------------------------------------------|-------------------|--------------------------------|--------------------------------|-------------------------------------------------------------------------------------|--------------------------------------------------------------------------------------------|
| Passage of the screw for the pedicle centre   | 1                 | 2                              | 3                              |  | 5                                                                                          |
| Screws alignment with vertebral plate         | 1                 | 1                              | 3                              | 4                                                                                   |         |
| Screws axis convergence in the sagittal plane | 1                 | 2                              | 3                              |  | 5                                                                                          |
| Screws interpenetration in vertebral surface  | CRITICS<br>(>4mm) | RELEVANT<br>(from 3mm to 4 mm) | MODERATE<br>(from 2mm to 3 mm) | SLIGHT<br>(<2mm)                                                                    |  ABSENT |

*VERTEBRA 2*

|                                               |                   |                                |                                                                                     |                                                                                      |                                                                                              |
|-----------------------------------------------|-------------------|--------------------------------|-------------------------------------------------------------------------------------|--------------------------------------------------------------------------------------|----------------------------------------------------------------------------------------------|
| Passage of the screw for the pedicle centre   | 1                 | 2                              | 3                                                                                   | 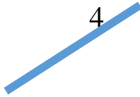  | 5                                                                                            |
| Screws alignment with vertebral plate         | 1                 | 1                              | 3                                                                                   |  | 5                                                                                            |
| Screws axis convergence in the sagittal plane | 1                 | 2                              |  | 4                                                                                    | 5                                                                                            |
| Screws interpenetration in vertebral surface  | CRITICS<br>(>4mm) | RELEVANT<br>(from 3mm to 4 mm) | MODERATE<br>(from 2mm to 3 mm)                                                      | SLIGHT<br>(<2mm)                                                                     |  ABSENT |

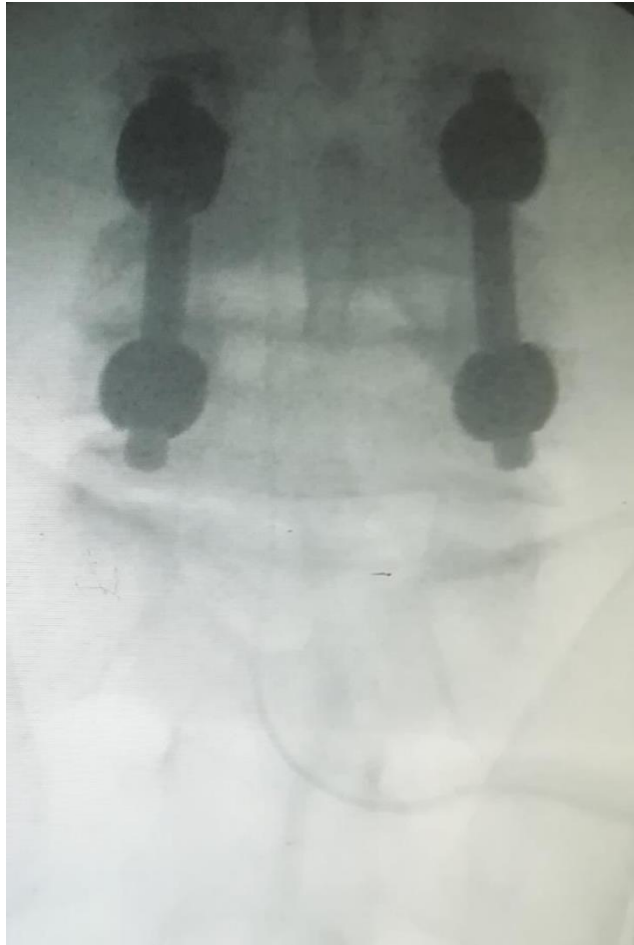

**Fig. 21** Post-operative coronal X-ray (n. 11SAL4L510)

## **Patient code n. 12VNL50**

### **Pathology**

- LEFT L5 Radiculitis

### **Surgery**

L4-L5 DECOMPRESSION AND POSTERIOR LUMBAR ARTRHODESIS FROM L4 TO S1

**DATA FOR CLINICAL TRIAL OF CUSTOM MADE VERTEBRAL TEMPLATE “SPINE  
SOLUTION”  
“SPINE SOLUTIONS”**

12VNL50

**1 livello (tratto sacrale - no trial)**

NO Template L5

NO Template S1

|                                    |                               |
|------------------------------------|-------------------------------|
| Surgery duration for each vertebra | Vertebra 1: L5→ <b>20 min</b> |
| Surgery duration for implantology  | 35 min                        |
| Total surgery duration             | 40 min                        |
| X-Ray shots                        | Vertebra 1= <b>6</b>          |
| Kirschner repositioning            | Vertebra 1 = <b>1</b>         |
| Pedicle screws repositioning       | Vertebra 1 = <b>0</b>         |

## **Patient code n. 13LDL3L4L5110**

### **Pathology**

- Vertebral stenosis L3-L4
- Radiculitis

### **Surgery**

DECOMPRESSIVE LAMINECTOMY AND PEDICLE ARTHRODESIS OF L3- L4- L5

**DATA FOR CLINICAL TRIAL OF CUSTOM MADE VERTEBRAL TEMPLATE “SPINE  
SOLUTION”  
“SPINE SOLUTIONS”**

13LDL3L4L5110

**3 segments**

Template L3

Template L4

No Template L5

|                                    |                                                                                                 |
|------------------------------------|-------------------------------------------------------------------------------------------------|
| Surgery duration for each vertebra | Vertebra 1: L4→ <b>16 min</b><br>Vertebra 2: L4→ <b>22 min</b><br>Vertebra 3: L5→ <b>52 min</b> |
| Surgery duration for implantology  | 87 min                                                                                          |
| Total surgery duration             | 120 min                                                                                         |
| X-Ray shots                        | Vertebra 1= <b>2</b><br>Vertebra 2= <b>2</b><br>Vertebra 3= <b>8</b>                            |
| Kirschner repositioning            | Vertebra 1 = <b>1</b><br>Vertebra 2 = <b>0</b><br>Vertebra 3 = <b>2</b>                         |
| Pedicle screws repositioning       | Vertebra 1 = <b>0</b><br>Vertebra 2 = <b>0</b><br>Vertebra 3 = <b>0</b>                         |

*VERTEBRA 1*

|                                               |                   |                                |                                |                                                                                       |                                                                                             |
|-----------------------------------------------|-------------------|--------------------------------|--------------------------------|---------------------------------------------------------------------------------------|---------------------------------------------------------------------------------------------|
| Passage of the screw for the pedicle centre   | 1                 | 2                              | 3                              | 4                                                                                     | 5 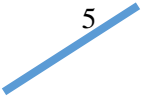       |
| Screws alignment with vertebral plate         | 1                 | 1                              | 3                              | 4  | 5                                                                                           |
| Screws axis convergence in the sagittal plane | 1                 | 2                              | 3                              | 4  | 5                                                                                           |
| Screws interpenetration in vertebral surface  | CRITICS<br>(>4mm) | RELEVANT<br>(from 3mm to 4 mm) | MODERATE<br>(from 2mm to 3 mm) | SLIGHT<br>(<2mm)                                                                      | ASSENTE  |

*VERTEBRA 2*

|                                               |                   |                                |                                                                                      |                                                                                         |                                                                                               |
|-----------------------------------------------|-------------------|--------------------------------|--------------------------------------------------------------------------------------|-----------------------------------------------------------------------------------------|-----------------------------------------------------------------------------------------------|
| Passage of the screw for the pedicle centre   | 1                 | 2                              | 3                                                                                    | 4                                                                                       | 5 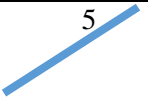         |
| Screws alignment with vertebral plate         | 1                 | 1                              | 3  | 4                                                                                       | 5                                                                                             |
| Screws axis convergence in the sagittal plane | 1                 | 2                              | 3                                                                                    | 4  | 5                                                                                             |
| Screws interpenetration in vertebral surface  | CRITICS<br>(>4mm) | RELEVANT<br>(from 3mm to 4 mm) | MODERATE<br>(from 2mm to 3 mm)                                                       | SLIGHT<br>(<2mm)                                                                        | ASSENTE  |

*VERTEBRA 3*

|                                               |                   |                                |                                                                                     |                                                                                       |                                                                                             |
|-----------------------------------------------|-------------------|--------------------------------|-------------------------------------------------------------------------------------|---------------------------------------------------------------------------------------|---------------------------------------------------------------------------------------------|
| Passage of the screw for the pedicle centre   | 1                 | 2                              | 3 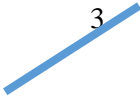 | 4                                                                                     | 5                                                                                           |
| Screws alignment with vertebral plate         | 1                 | 1                              | 3  | 4                                                                                     | 5                                                                                           |
| Screws axis convergence in the sagittal plane | 1                 | 2                              | 3                                                                                   | 4  | 5                                                                                           |
| Screws interpenetration in vertebral surface  | CRITICS<br>(>4mm) | RELEVANT<br>(from 3mm to 4 mm) | MODERATE<br>(from 2mm to 3 mm)                                                      | SLIGHT<br>(<2mm)                                                                      | ASSENTE  |



## **Patient code n. 14DDL3L4L5010**

### **Pathology**

- Vertebral collapse of L4 e L5
- Serious spondilosis
- L4 spinous process recess
- Serious osteoporosis

Note: L2 pedicle screws has been removed for serious osteoporosis

### **Surgery**

ARTHRODESIS OF THE LUMBAR TRACT L3- L4- L5

**DATA FOR CLINICAL TRIAL OF CUSTOM MADE VERTEBRAL TEMPLATE “SPINE  
SOLUTION”  
“SPINE SOLUTIONS”**

14DDL3L4L5010

**3 segments**

No Template L3

Template L4

No Template L5

|                                    |                                                                                                |
|------------------------------------|------------------------------------------------------------------------------------------------|
| Surgery duration for each vertebra | Vertebra 1: L3→ <b>45 min</b><br>Vertebra 2: L4→ <b>18 min</b><br>Vertebra 3: L→ <b>67 min</b> |
| Surgery duration for implantology  | 130 min                                                                                        |
| Total surgery duration             | 150 min                                                                                        |
| X-Ray shots                        | Vertebra 1= <b>9</b><br>Vertebra 2= <b>3</b><br>Vertebra 3= <b>13</b>                          |
| Kirschner repositioning            | Vertebra 1 = <b>5</b><br>Vertebra 2 = <b>0</b><br>Vertebra 3 = <b>7</b>                        |
| Pedicle screws repositioning       | Vertebra 1 = <b>0</b><br>Vertebra 2 = <b>0</b><br>Vertebra 3 = <b>0</b>                        |

*VERTEBRA 1*

|                                               |                   |                                |                                                                                   |                                                                                     |                                                                                     |
|-----------------------------------------------|-------------------|--------------------------------|-----------------------------------------------------------------------------------|-------------------------------------------------------------------------------------|-------------------------------------------------------------------------------------|
| Passage of the screw for the pedicle centre   | 1                 | 2                              | 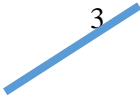 | 4                                                                                   | 5                                                                                   |
| Screws alignment with vertebral plate         | 1                 | 1                              | 3                                                                                 |  | 5                                                                                   |
| Screws axis convergence in the sagittal plane | 1                 | 2                              |  | 4                                                                                   | 5                                                                                   |
| Screws interpenetration in vertebral surface  | CRITICS<br>(>4mm) | RELEVANT<br>(from 3mm to 4 mm) | MODERATE<br>(from 2mm to 3 mm)                                                    | SLIGHT<br>(<2mm)                                                                    |  |

*VERTEBRA 2*

|                                               |                   |                                |                                |                                                                                       |                                                                                       |
|-----------------------------------------------|-------------------|--------------------------------|--------------------------------|---------------------------------------------------------------------------------------|---------------------------------------------------------------------------------------|
| Passage of the screw for the pedicle centre   | 1                 | 2                              | 3                              | 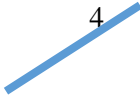   | 5                                                                                     |
| Screws alignment with vertebral plate         | 1                 | 1                              | 3                              |   | 5                                                                                     |
| Screws axis convergence in the sagittal plane | 1                 | 2                              | 3                              |  | 5                                                                                     |
| Screws interpenetration in vertebral surface  | CRITICS<br>(>4mm) | RELEVANT<br>(from 3mm to 4 mm) | MODERATE<br>(from 2mm to 3 mm) | SLIGHT<br>(<2mm)                                                                      |  |

*VERTEBRA 3*

|                                               |                     |                                |                                |                                                                                     |                                                                                            |
|-----------------------------------------------|---------------------|--------------------------------|--------------------------------|-------------------------------------------------------------------------------------|--------------------------------------------------------------------------------------------|
| Passage of the screw for the pedicle centre   | 1                   | 2                              | 3                              | 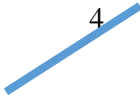 | 5                                                                                          |
| Screws alignment with vertebral plate         | 1                   | 1                              | 3                              | 4                                                                                   |         |
| Screws axis convergence in the sagittal plane | 1                   | 2                              | 3                              |  | 5                                                                                          |
| Screws interpenetration in vertebral surface  | CRITICALS<br>(>4mm) | RELEVANT<br>(from 3mm to 4 mm) | MODERATE<br>(from 2mm to 3 mm) | SLIGHT<br>(<2mm)                                                                    |  ABSENT |

## **Patient code n. 15ADL3L4L5110**

### **Pathology**

- Vertebral stenosis L4-L5
- Hernial protusion L3
- Spondylosis L4-L5

### **Surgery**

Decompressive Laminectomy with ernia removal and recalibrage and pedicle arthrodesis

NOTE: L5 pedicle screws has been removed for serious osteoporosis

**DATA FOR CLINICAL TRIAL OF CUSTOM MADE VERTEBRAL TEMPLATE “SPINE  
SOLUTION”  
“SPINE SOLUTIONS”**

15ADL3L4L5110

**3 segments**

Template L3

Template L4

No Template L5

|                                    |                                                                                                          |
|------------------------------------|----------------------------------------------------------------------------------------------------------|
| Surgery duration for each vertebra | Vertebra 1: L3→ <b>10 min</b><br><br>Vertebra 2: L4→ <b>12 min</b><br><br>Vertebra 3: L5→ <b>108 min</b> |
| Surgery duration for implantology  | 130 min                                                                                                  |
| Total surgery duration             | 145 min                                                                                                  |
| X-Ray shots                        | Vertebra 1= <b>2</b><br>Vertebra 2= <b>4</b><br>Vertebra 3= <b>31</b>                                    |
| Kirschner repositioning            | Vertebra 1 = <b>0</b><br>Vertebra 2 = <b>0</b><br>Vertebra 3 = <b>16</b>                                 |
| Pedicle screws repositioning       | Vertebra 1 = <b>0</b><br>Vertebra 2 = <b>0</b><br>Vertebra 3 = <b>1</b>                                  |

*VERTEBRA 1*

|                                               |                   |                                |                                |                                                                                       |                                                                                            |
|-----------------------------------------------|-------------------|--------------------------------|--------------------------------|---------------------------------------------------------------------------------------|--------------------------------------------------------------------------------------------|
| Passage of the screw for the pedicle centre   | 1                 | 2                              | 3                              | 4 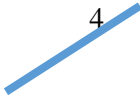 | 5                                                                                          |
| Screws alignment with vertebral plate         | 1                 | 1                              | 3                              | 4  | 5                                                                                          |
| Screws axis convergence in the sagittal plane | 1                 | 2                              | 3                              | 4                                                                                     | 5       |
| Screws interpenetration in vertebral surface  | CRITICS<br>(>4mm) | RELEVANT<br>(from 3mm to 4 mm) | MODERATE<br>(from 2mm to 3 mm) | SLIGHT<br>(<2mm)                                                                      | ABSENT  |

*VERTEBRA 2*

|                                               |                   |                                |                                |                                                                                         |                                                                                              |
|-----------------------------------------------|-------------------|--------------------------------|--------------------------------|-----------------------------------------------------------------------------------------|----------------------------------------------------------------------------------------------|
| Passage of the screw for the pedicle centre   | 1                 | 2                              | 3                              | 4 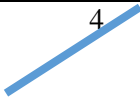   | 5                                                                                            |
| Screws alignment with vertebral plate         | 1                 | 1                              | 3                              | 4   | 5                                                                                            |
| Screws axis convergence in the sagittal plane | 1                 | 2                              | 3                              | 4  | 5                                                                                            |
| Screws interpenetration in vertebral surface  | CRITICS<br>(>4mm) | RELEVANT<br>(from 3mm to 4 mm) | MODERATE<br>(from 2mm to 3 mm) | SLIGHT<br>(<2mm)                                                                        | ABSENT  |

*VERTEBRA 3*

|                                               |                     |                                |                                |                  |        |
|-----------------------------------------------|---------------------|--------------------------------|--------------------------------|------------------|--------|
| Passage of the screw for the pedicle centre   | 1                   | 2                              | 3                              | 4                | 5      |
| Screws alignment with vertebral plate         | 1                   | 1                              | 3                              | 4                | 5      |
| Screws axis convergence in the sagittal plane | 1                   | 2                              | 3                              | 4                | 5      |
| Screws interpenetration in vertebral surface  | CRITICALS<br>(>4mm) | RELEVANT<br>(from 3mm to 4 mm) | MODERATE<br>(from 2mm to 3 mm) | SLIGHT<br>(<2mm) | ABSENT |



## **Patient code n. 16SDL2L3L4101**

### **Pathology**

- Vertebral stenosis L4-L5
- vertebral L4-L5 fusion
- Spondilosis and medial discal hernia with II degree Modic

### **Surgery**

Decompressive laminectomy and lumbar stabilization

**DATA FOR CLINICAL TRIAL OF CUSTOM MADE VERTEBRAL TEMPLATE “SPINE  
SOLUTION”  
“SPINE SOLUTIONS”**

16SDL2L3L4101

**3 segments**

Template L2

No Template L3

Template L4

|                                    |                                                                                                 |
|------------------------------------|-------------------------------------------------------------------------------------------------|
| Surgery duration for each vertebra | Vertebra 1: L2→ <b>10 min</b><br>Vertebra 2: L3→ <b>55 min</b><br>Vertebra 3: L4→ <b>15 min</b> |
| Surgery duration for implantology  | 80 min                                                                                          |
| Total surgery duration             | 100 min                                                                                         |
| X-Ray shots                        | Vertebra 1= <b>3</b><br>Vertebra 2= <b>12</b><br>Vertebra 3= <b>3</b>                           |
| Kirschner repositioning            | Vertebra 1 = <b>1</b><br>Vertebra 2 = <b>3</b><br>Vertebra 3 = <b>0</b>                         |
| Pedicle screws repositioning       | Vertebra 1 = <b>0</b><br>Vertebra 2 = <b>0</b><br>Vertebra 3 = <b>0</b>                         |

*VERTEBRA 1*

|                                               |                   |                                |                                |                                                                                     |                                                                                     |
|-----------------------------------------------|-------------------|--------------------------------|--------------------------------|-------------------------------------------------------------------------------------|-------------------------------------------------------------------------------------|
| Passage of the screw for the pedicle centre   | 1                 | 2                              | 3                              | 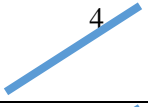 | 5                                                                                   |
| Screws alignment with vertebral plate         | 1                 | 1                              | 3                              |  | 5                                                                                   |
| Screws axis convergence in the sagittal plane | 1                 | 2                              | 3                              | 4                                                                                   |  |
| Screws interpenetration in vertebral surface  | CRITICS<br>(>4mm) | RELEVANT<br>(from 3mm to 4 mm) | MODERATE<br>(from 2mm to 3 mm) | SLIGHT<br>(<2mm)                                                                    |  |

*VERTEBRA 2*

|                                               |                   |                                |                                                                                     |                                                                                     |                                                                                       |
|-----------------------------------------------|-------------------|--------------------------------|-------------------------------------------------------------------------------------|-------------------------------------------------------------------------------------|---------------------------------------------------------------------------------------|
| Passage of the screw for the pedicle centre   | 1                 | 2                              | 3                                                                                   | 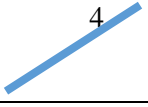 | 5                                                                                     |
| Screws alignment with vertebral plate         | 1                 | 1                              | 3                                                                                   | 4                                                                                   |   |
| Screws axis convergence in the sagittal plane | 1                 | 2                              |  | 4                                                                                   | 5                                                                                     |
| Screws interpenetration in vertebral surface  | CRITICS<br>(>4mm) | RELEVANT<br>(from 3mm to 4 mm) | MODERATE<br>(from 2mm to 3 mm)                                                      | SLIGHT<br>(<2mm)                                                                    |  |

*VERTEBRA 3*

|                                               |                     |                                |                                |                  |        |
|-----------------------------------------------|---------------------|--------------------------------|--------------------------------|------------------|--------|
| Passage of the screw for the pedicle centre   | 1                   | 2                              | 3                              | 4                | 5      |
| Screws alignment with vertebral plate         | 1                   | 1                              | 3                              | 4                | 5      |
| Screws axis convergence in the sagittal plane | 1                   | 2                              | 3                              | 4                | 5      |
| Screws interpenetration in vertebral surface  | CRITICALS<br>(>4mm) | RELEVANT<br>(from 3mm to 4 mm) | MODERATE<br>(from 2mm to 3 mm) | SLIGHT<br>(<2mm) | ABSENT |

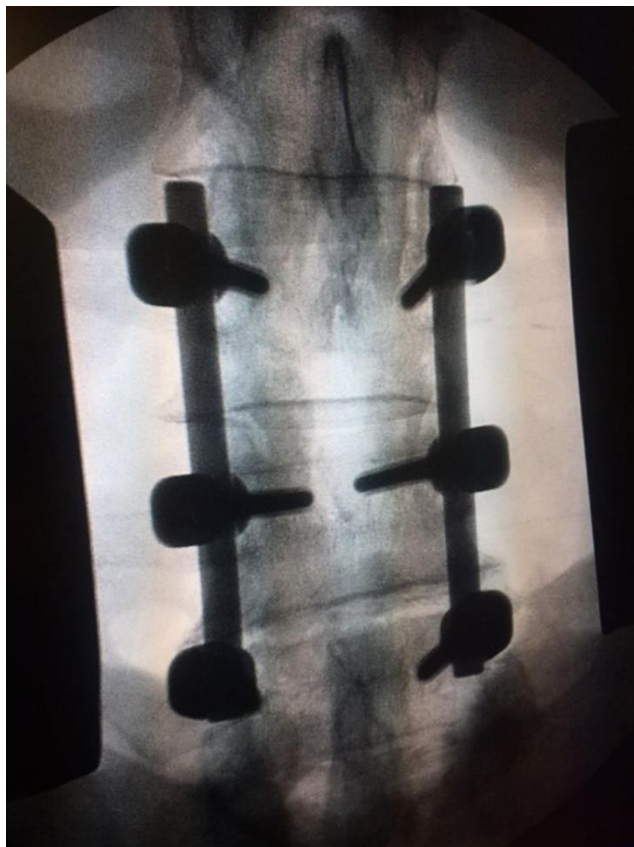

**Fig. 22** Post-operative coronal X-ray (n. 16SDL2L3L4101)

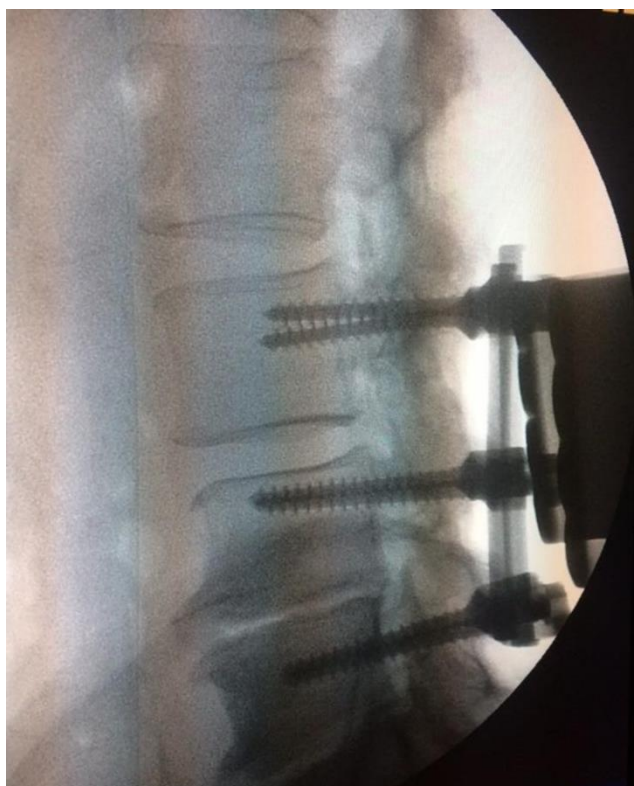

**Fig. 23** Post-operative sagittal X-ray (n. 16SDL2L3L4101)



## **Patient code n. 17DKL1L2L3L41001**

### **Pathology**

- Vertebral stenosis L2-L3 ed-L3-L4
- MODERATE radicular impairment

### **Surgery**

Calibration and decompressive laminectomy with pedicle stabilization

Note: cause the small pedicle diameter, need very small diameter screws

**DATA FOR CLINICAL TRIAL OF CUSTOM MADE VERTEBRAL TEMPLATE “SPINE SOLUTION”**

**“SPINE SOLUTIONS”**

17DKL1L2L3L41001

**4 segments**

Template L1

No Template L2

No Template L3

Template L4

|                                    |                                                                                                                                                   |
|------------------------------------|---------------------------------------------------------------------------------------------------------------------------------------------------|
| Surgery duration for each vertebra | Vertebra 1: L1 → <b>14 min</b><br><br>Vertebra 2: L2 → <b>57 min</b><br><br>Vertebra 3: L3 → <b>100 min</b><br><br>Vertebra 4: L4 → <b>18 min</b> |
| Surgery duration for implantology  | 189 min                                                                                                                                           |
| Total surgery duration             | 210 min                                                                                                                                           |
| X-Ray shots                        | Vertebra 1 = <b>2</b><br>Vertebra 2 = <b>11</b><br>Vertebra 3 = <b>19</b><br>Vertebra 4 = <b>2</b>                                                |
| Kirschner repositioning            | Vertebra 1 = <b>0</b><br>Vertebra 2 = <b>8</b><br>Vertebra 3 = <b>2</b><br>Vertebra 4 = <b>2</b>                                                  |
| Pedicle screws repositioning       | Vertebra 1 = <b>0</b><br>Vertebra 2 = <b>0</b><br>Vertebra 3 = <b>2</b><br>Vertebra 4 = <b>0</b>                                                  |



*VERTEBRA 1*

|                                               |                   |                                |                                |                                                                                     |                                                                                                          |
|-----------------------------------------------|-------------------|--------------------------------|--------------------------------|-------------------------------------------------------------------------------------|----------------------------------------------------------------------------------------------------------|
| Passage of the screw for the pedicle centre   | 1                 | 2                              | 3                              | 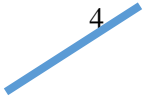 | 5                                                                                                        |
| Screws alignment with vertebral plate         | 1                 | 1                              | 3                              | 4                                                                                   |                       |
| Screws axis convergence in the sagittal plane | 1                 | 2                              | 3                              | 4                                                                                   |                       |
| Screws interpenetration in vertebral surface  | CRITICS<br>(>4mm) | RELEVANT<br>(from 3mm to 4 mm) | MODERATE<br>(from 2mm to 3 mm) | SLIGHT<br>(<2mm)                                                                    | <del>ABSENT</del><br> |

*VERTEBRA 2*

|                                               |                   |                                |                                                                                     |                                                                                      |                                                                                                            |
|-----------------------------------------------|-------------------|--------------------------------|-------------------------------------------------------------------------------------|--------------------------------------------------------------------------------------|------------------------------------------------------------------------------------------------------------|
| Passage of the screw for the pedicle centre   | 1                 | 2                              | 3                                                                                   | 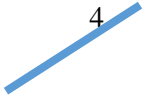  | 5                                                                                                          |
| Screws alignment with vertebral plate         | 1                 | 1                              | 3                                                                                   |  | 5                                                                                                          |
| Screws axis convergence in the sagittal plane | 1                 | 2                              |  | 4                                                                                    | 5                                                                                                          |
| Screws interpenetration in vertebral surface  | CRITICS<br>(>4mm) | RELEVANT<br>(from 3mm to 4 mm) | MODERATE<br>(from 2mm to 3 mm)                                                      | SLIGHT<br>(<2mm)                                                                     | <del>ABSENT</del><br> |

*VERTEBRA 3*

|                                               |                   |                                |                                                                                   |                                                                                     |                                                                                                       |
|-----------------------------------------------|-------------------|--------------------------------|-----------------------------------------------------------------------------------|-------------------------------------------------------------------------------------|-------------------------------------------------------------------------------------------------------|
| Passage of the screw for the pedicle centre   | 1                 | 2                              | 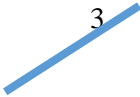 | 4                                                                                   | 5                                                                                                     |
| Screws alignment with vertebral plate         | 1                 | 1                              | 3                                                                                 |  | 5                                                                                                     |
| Screws axis convergence in the sagittal plane | 1                 | 2                              | 3                                                                                 |  | 5                                                                                                     |
| Screws interpenetration in vertebral surface  | CRITICS<br>(>4mm) | RELEVANT<br>(from 3mm to 4 mm) | MODERATE<br>(from 2mm to 3 mm)                                                    | SLIGHT<br>(<2mm)                                                                    |  <del>ABSENT</del> |

*VERTEBRA 4*

|                                               |                   |                                |                                |                                                                                       |                                                                                                         |
|-----------------------------------------------|-------------------|--------------------------------|--------------------------------|---------------------------------------------------------------------------------------|---------------------------------------------------------------------------------------------------------|
| Passage of the screw for the pedicle centre   | 1                 | 2                              | 3                              | 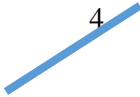   | 5                                                                                                       |
| Screws alignment with vertebral plate         | 1                 | 1                              | 3                              | 4                                                                                     |                     |
| Screws axis convergence in the sagittal plane | 1                 | 2                              | 3                              |  | 5                                                                                                       |
| Screws interpenetration in vertebral surface  | CRITICS<br>(>4mm) | RELEVANT<br>(from 3mm to 4 mm) | MODERATE<br>(from 2mm to 3 mm) | SLIGHT<br>(<2mm)                                                                      |  <del>ABSENT</del> |

## **Patient code n. 18LGL1L2L3L41101**

### **Pathology**

- Vertebral stenosis L1-L2-L3
- Spondylosis and discal hernia with II degree Modic

### **Surgery**

Vertebral Stabilization and pedicle arthrodesis

**DATA FOR CLINICAL TRIAL OF CUSTOM MADE VERTEBRAL TEMPLATE “SPINE  
SOLUTION”  
“SPINE SOLUTIONS”**

18LGL1L2L3L41101

**4 segments**

Template L1

Template L2

No Template L3

Template L4

|                                    |                                                                                                                                   |
|------------------------------------|-----------------------------------------------------------------------------------------------------------------------------------|
| Surgery duration for each vertebra | Vertebra 1: L1→ <b>16 min</b><br>Vertebra 2: L2→ <b>18 min</b><br>Vertebra 3: L3→ <b>154 min</b><br>Vertebra 4: L4→ <b>12 min</b> |
| Surgery duration for implantology  | 200min                                                                                                                            |
| Total surgery duration             | 220 min                                                                                                                           |
| X-Ray shots                        | Vertebra 1= <b>2</b><br>Vertebra 2= <b>3</b><br>Vertebra 3= <b>29</b><br>Vertebra 4= <b>5</b>                                     |
| Kirschner repositioning            | Vertebra 1 = <b>0</b><br>Vertebra 2 = <b>1</b><br>Vertebra 3 = <b>12</b><br>Vertebra 4= <b>2</b>                                  |
| Pedicle screws repositioning       | Vertebra 1 = <b>0</b><br>Vertebra 2 = <b>0</b><br>Vertebra 3 = <b>0</b><br>Vertebra 4 = <b>0</b>                                  |

*VERTEBRA 1*

|                                               |                   |                                |                                                                                   |                                                                                     |                                                                                     |
|-----------------------------------------------|-------------------|--------------------------------|-----------------------------------------------------------------------------------|-------------------------------------------------------------------------------------|-------------------------------------------------------------------------------------|
| Passage of the screw for the pedicle centre   | 1                 | 2                              | 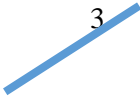 | 4                                                                                   | 5                                                                                   |
| Screws alignment with vertebral plate         | 1                 | 1                              | 3                                                                                 | 4                                                                                   |  |
| Screws axis convergence in the sagittal plane | 1                 | 2                              | 3                                                                                 |  | 5                                                                                   |
| Screws interpenetration in vertebral surface  | CRITICS<br>(>4mm) | RELEVANT<br>(from 3mm to 4 mm) | MODERATE<br>(from 2mm to 3 mm)                                                    | SLIGHT<br>(<2mm)                                                                    |  |

*VERTEBRA 2*

|                                               |                   |                                |                                                                                   |                                                                                       |        |
|-----------------------------------------------|-------------------|--------------------------------|-----------------------------------------------------------------------------------|---------------------------------------------------------------------------------------|--------|
| Passage of the screw for the pedicle centre   | 1                 | 2                              | 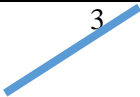 | 4                                                                                     | 5      |
| Screws alignment with vertebral plate         | 1                 | 1                              | 3                                                                                 |   | 5      |
| Screws axis convergence in the sagittal plane | 1                 | 2                              | 3                                                                                 |  | 5      |
| Screws interpenetration in vertebral surface  | CRITICS<br>(>4mm) | RELEVANT<br>(from 3mm to 4 mm) | MODERATE<br>(from 2mm to 3 mm)                                                    |  | ABSENT |

*VERTEBRA 3*

|                                               |                   |                                |                                                                                   |                                                                                     |                                                                                            |
|-----------------------------------------------|-------------------|--------------------------------|-----------------------------------------------------------------------------------|-------------------------------------------------------------------------------------|--------------------------------------------------------------------------------------------|
| Passage of the screw for the pedicle centre   | 1                 | 2                              | 3                                                                                 | 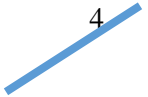 | 5                                                                                          |
| Screws alignment with vertebral plate         | 1                 | 1                              | 3                                                                                 | 4                                                                                   |         |
| Screws axis convergence in the sagittal plane | 1                 | 2                              |  | 4                                                                                   | 5                                                                                          |
| Screws interpenetration in vertebral surface  | CRITICS<br>(>4mm) | RELEVANT<br>(from 3mm to 4 mm) | MODERATE<br>(from 2mm to 3 mm)                                                    | SLIGHT<br>(<2mm)                                                                    |  ABSENT |

*VERTEBRA 4*

|                                               |                   |                                |                                |                                                                                       |                                                                                              |
|-----------------------------------------------|-------------------|--------------------------------|--------------------------------|---------------------------------------------------------------------------------------|----------------------------------------------------------------------------------------------|
| Passage of the screw for the pedicle centre   | 1                 | 2                              | 3                              | 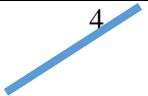  | 5                                                                                            |
| Screws alignment with vertebral plate         | 1                 | 1                              | 3                              | 4                                                                                     |         |
| Screws axis convergence in the sagittal plane | 1                 | 2                              | 3                              |  | 5                                                                                            |
| Screws interpenetration in vertebral surface  | CRITICS<br>(>4mm) | RELEVANT<br>(from 3mm to 4 mm) | MODERATE<br>(from 2mm to 3 mm) | SLIGHT<br>(<2mm)                                                                      |  ABSENT |

## **Patient code n. 19GPL1L2L3L40101**

### **Pathology**

- Vertebral stenosis L1-L2-L3
- Discal hernia L4 with radicular impairment
- Bone neoplasia

### **Surgery**

Lumbar Stabilization and decompressive laminectomy L2-L3

**DATA FOR CLINICAL TRIAL OF CUSTOM MADE VERTEBRAL TEMPLATE “SPINE SOLUTION”  
“SPINE SOLUTIONS”**

19GPL1L2L3L40101

**4 segments**

No Template L1

Template L2

No Template L3

Template L4

|                                    |                                                                                                                                    |
|------------------------------------|------------------------------------------------------------------------------------------------------------------------------------|
| Surgery duration for each vertebra | Vertebra 1: L1 → <b>75 min</b><br>Vertebra 2: L2 → <b>9 min</b><br>Vertebra 3: L → <b>48 min</b><br>Vertebra 4: L4 → <b>18 min</b> |
| Surgery duration for implantology  | 150min                                                                                                                             |
| Total surgery duration             | 180 min                                                                                                                            |
| X-Ray shots                        | Vertebra 1 = <b>12</b><br>Vertebra 2 = <b>2</b><br>Vertebra 3 = <b>6</b><br>Vertebra 4 = <b>3</b>                                  |
| Kirschner repositioning            | Vertebra 1 = <b>4</b><br>Vertebra 2 = <b>0</b><br>Vertebra 3 = <b>2</b><br>Vertebra 4 = <b>0</b>                                   |
| Pedicle screws repositioning       | Vertebra 1 = <b>0</b><br>Vertebra 2 = <b>0</b><br>Vertebra 3 = <b>0</b><br>Vertebra 4 = <b>0</b>                                   |



*VERTEBRA 1*

|                                               |                   |                                |                                                                                   |                                                                                     |                                                                                     |
|-----------------------------------------------|-------------------|--------------------------------|-----------------------------------------------------------------------------------|-------------------------------------------------------------------------------------|-------------------------------------------------------------------------------------|
| Passage of the screw for the pedicle centre   | 1                 | 2                              |  | 4                                                                                   | 5                                                                                   |
| Screws alignment with vertebral plate         | 1                 | 1                              | 3                                                                                 |  | 5                                                                                   |
| Screws axis convergence in the sagittal plane | 1                 | 2                              | 3                                                                                 |  | 5                                                                                   |
| Screws interpenetration in vertebral surface  | CRITICS<br>(>4mm) | RELEVANT<br>(from 3mm to 4 mm) | MODERATE<br>(from 2mm to 3 mm)                                                    | SLIGHT<br>(<2mm)                                                                    |  |

*VERTEBRA 2*

|                                               |                   |                                |                                                                                   |                                                                                       |                                                                                       |
|-----------------------------------------------|-------------------|--------------------------------|-----------------------------------------------------------------------------------|---------------------------------------------------------------------------------------|---------------------------------------------------------------------------------------|
| Passage of the screw for the pedicle centre   | 1                 | 2                              | 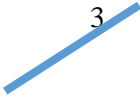 | 4                                                                                     | 5                                                                                     |
| Screws alignment with vertebral plate         | 1                 | 1                              | 3                                                                                 | 4                                                                                     |   |
| Screws axis convergence in the sagittal plane | 1                 | 2                              | 3                                                                                 |  | 5                                                                                     |
| Screws interpenetration in vertebral surface  | CRITICS<br>(>4mm) | RELEVANT<br>(from 3mm to 4 mm) | MODERATE<br>(from 2mm to 3 mm)                                                    | SLIGHT<br>(<2mm)                                                                      |  |

*VERTEBRA 3*

|                                               |                   |                                |                                |                                                                                     |                                                                                                          |
|-----------------------------------------------|-------------------|--------------------------------|--------------------------------|-------------------------------------------------------------------------------------|----------------------------------------------------------------------------------------------------------|
| Passage of the screw for the pedicle centre   | 1                 | 2                              | 3                              | 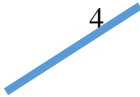 | 5                                                                                                        |
| Screws alignment with vertebral plate         | 1                 | 1                              | 3                              | 4                                                                                   |                       |
| Screws axis convergence in the sagittal plane | 1                 | 2                              | 3                              |  | 5                                                                                                        |
| Screws interpenetration in vertebral surface  | CRITICS<br>(>4mm) | RELEVANT<br>(from 3mm to 4 mm) | MODERATE<br>(from 2mm to 3 mm) | SLIGHT<br>(<2mm)                                                                    | <del>ABSENT</del><br> |

*VERTEBRA 4*

|                                               |                   |                                |                                                                                     |                                                                                      |                                                                                                            |
|-----------------------------------------------|-------------------|--------------------------------|-------------------------------------------------------------------------------------|--------------------------------------------------------------------------------------|------------------------------------------------------------------------------------------------------------|
| Passage of the screw for the pedicle centre   | 1                 | 2                              | 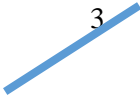   | 4                                                                                    | 5                                                                                                          |
| Screws alignment with vertebral plate         | 1                 | 1                              | 3                                                                                   |  | 5                                                                                                          |
| Screws axis convergence in the sagittal plane | 1                 | 2                              |  | 4                                                                                    | 5                                                                                                          |
| Screws interpenetration in vertebral surface  | CRITICS<br>(>4mm) | RELEVANT<br>(from 3mm to 4 mm) | MODERATE<br>(from 2mm to 3 mm)                                                      | SLIGHT<br>(<2mm)                                                                     | <del>ABSENT</del><br> |

## **Patient code n. 20LVL1L2L3110**

### **Pathology**

- Vertebral stenosis L1-L2-L3
- Spondylosis and median discal hernia with II degree Modic

### **Surgery**

Vertebral Stabilization and lumbar stenosis

Note: L2 screws has been removed for serious osteoporosis

**DATA FOR CLINICAL TRIAL OF CUSTOM MADE VERTEBRAL TEMPLATE “SPINE  
SOLUTION”  
“SPINE SOLUTIONS”**

20LVL1L2L3110

**3 segments**

Template L1

Template L2

No Template L3

|                                    |                                                                                                       |
|------------------------------------|-------------------------------------------------------------------------------------------------------|
| Surgery duration for each vertebra | Vertebra 1: L1→ <b>8 min</b><br><br>Vertebra 2: L2→ <b>12 min</b><br><br>Vertebra 3: L3→ <b>6 min</b> |
| Surgery duration for implantology  | 26 min                                                                                                |
| Total surgery duration             | 60 min                                                                                                |
| X-Ray shots                        | Vertebra 1= <b>3</b><br>Vertebra 2= <b>3</b><br>Vertebra 3= <b>9</b>                                  |
| Kirschner repositioning            | Vertebra 1 = <b>0</b><br>Vertebra 2 = <b>0</b><br>Vertebra 3 = <b>4</b>                               |
| Pedicle screws repositioning       | Vertebra 1 = <b>0</b><br>Vertebra 2 = <b>0</b><br>Vertebra 3 = <b>1</b>                               |

# *VERTEBRA 1*

|                                               |                   |                                |                                |                  |        |
|-----------------------------------------------|-------------------|--------------------------------|--------------------------------|------------------|--------|
| Passage of the screw for the pedicle centre   | 1                 | 2                              | 3                              | 4                | 5      |
| Screws alignment with vertebral plate         | 1                 | 1                              | 3                              | 4                | 5      |
| Screws axis convergence in the sagittal plane | 1                 | 2                              | 3                              | 4                | 5      |
| Screws interpenetration in vertebral surface  | CRITICS<br>(>4mm) | RELEVANT<br>(from 3mm to 4 mm) | MODERATE<br>(from 2mm to 3 mm) | SLIGHT<br>(<2mm) | ABSENT |

# *VERTEBRA 2*

|                                               |                   |                                |                                |                  |        |
|-----------------------------------------------|-------------------|--------------------------------|--------------------------------|------------------|--------|
| Passage of the screw for the pedicle centre   | 1                 | 2                              | 3                              | 4                | 5      |
| Screws alignment with vertebral plate         | 1                 | 1                              | 3                              | 4                | 5      |
| Screws axis convergence in the sagittal plane | 1                 | 2                              | 3                              | 4                | 5      |
| Screws interpenetration in vertebral surface  | CRITICS<br>(>4mm) | RELEVANT<br>(from 3mm to 4 mm) | MODERATE<br>(from 2mm to 3 mm) | SLIGHT<br>(<2mm) | ABSENT |

*VERTEBRA 3*

|                                               |                   |                                |                                |                                                                                     |                                                                                            |
|-----------------------------------------------|-------------------|--------------------------------|--------------------------------|-------------------------------------------------------------------------------------|--------------------------------------------------------------------------------------------|
| Passage of the screw for the pedicle centre   | 1                 | 2                              | 3                              | 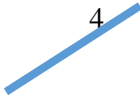 | 5                                                                                          |
| Screws alignment with vertebral plate         | 1                 | 1                              | 3                              | 4                                                                                   |         |
| Screws axis convergence in the sagittal plane | 1                 | 2                              | 3                              |  | 5                                                                                          |
| Screws interpenetration in vertebral surface  | CRITICS<br>(>4mm) | RELEVANT<br>(from 3mm to 4 mm) | MODERATE<br>(from 2mm to 3 mm) | SLIGHT<br>(<2mm)                                                                    |  ABSENT |
